# Supplementary material for: Soil greenhouse gases emissions reduce the benefit of mangrove plant to mitigating atmospheric warming effect
Source: Copernicus journal article supplement (doi:10.5194/bg-2015-662), 2016-02-10
Supplement: Supplementary file [file bg-2015-662-AC3-supplement.pdf]

# Soil greenhouse gases emissions reduce the benefit of mangrove plants to mitigating atmospheric warming effect

Guangcheng Chen<sup>1</sup> Bin Chen<sup>1</sup>, Dan Yu<sup>2</sup>, Nora F.Y. Tam<sup>3</sup>, Yong Ye<sup>2</sup>, Shunyang Chen<sup>1</sup>

<sup>1</sup> Third Institute of Oceanography, State Oceanic Administration, Xiamen, Fujian, 361005, China

<sup>2</sup> Key Laboratory of the Ministry of Education for Coastal and Wetland Ecosystems, Xiamen University, Xiamen, Fujian, 361102, China

<sup>3</sup> Department of Biology and Chemistry, City University of Hong Kong, Hong Kong SAR, China

*Correspondence to:* G. Chen (gc.chen@tio.org.cn); Y. Ye (yeyong@xmu.edu.cn)

## Abstract

Mangrove soils have been recognized as sources of atmospheric greenhouse gases, but the atmospheric fluxes are poorly characterized, and their adverse warming effect has scarcely been considered with respect to the role of mangrove wetlands in mitigating global warming. The present study balanced the warming effect of soil greenhouse gas emissions with plant carbon dioxide (CO<sub>2</sub>) sequestration rate derived from net primary production of plants in a productive mangrove wetland in South China to assess the role of mangrove wetland in mitigating atmospheric warming. Seasonal fluxes of the three greenhouse gases, nitrous oxide (N<sub>2</sub>O), methane (CH<sub>4</sub>) and CO<sub>2</sub>, were measured at three mangrove sites in Jiulong River Estuary, and net primary productions of mangrove plants were estimated from the litter fall production (9 replicates for these samplings in each site). Soil characteristics were also studied in the summer to examine their relationships with gas fluxes. Soil to atmosphere gas fluxes ranged from -1.6 to 50.0 μg N<sub>2</sub>O m<sup>-2</sup> h<sup>-1</sup>, from -1.4 to 3215.3 μg CH<sub>4</sub> m<sup>-2</sup> h<sup>-1</sup> and from -31 to 512 mg CO<sub>2</sub> m<sup>-2</sup> h<sup>-1</sup> in the present study, indicating that soils release significant greenhouse gases into atmosphere. The results also showed that gas fluxes were significantly higher in the summer and also different among mangrove sites. Gas fluxes in summer were positively correlated with the soil organic carbon, total nitrogen, and NH<sub>4</sub><sup>+</sup>-N contents. The mangrove plants were able to sequester a considerable amount of atmospheric CO<sub>2</sub> at rates between -3652 g CO<sub>2</sub> m<sup>-2</sup> yr<sup>-1</sup> and -7420 g CO<sub>2</sub> m<sup>-2</sup> yr<sup>-1</sup>. The ecosystem was a source of methane (CH<sub>4</sub>) and nitrous oxide (N<sub>2</sub>O) gases but meanwhile

1 more intense CO<sub>2</sub> sink. However, the total CO<sub>2</sub>-equivalent flux of the three gases indicating their  
2 warming effect accounted for 9.3-32.7 % of the plant CO<sub>2</sub> sequestration rate, indicating that the  
3 warming effect of soil greenhouse gas emissions could partially offset the benefit of mangrove plants  
4 to in mitigating atmospheric warming. We therefore propose the assessment of the direct mitigation of  
5 atmospheric warming by mangrove ecosystem that take into account both soil greenhouse gases  
6 emissions and plant CO<sub>2</sub> sequestration. Moreover, the contribution of two trace gases, N<sub>2</sub>O and CH<sub>4</sub>,  
7 was also relevant, comprising 9.7-33.2 % of the total warming effect.

## 8 **1 Introduction**

9 The global atmospheric concentrations of greenhouse gases, carbon dioxide (CO<sub>2</sub>), and other two trace  
10 gases, methane (CH<sub>4</sub>) and nitrous oxide (N<sub>2</sub>O) have all shown large increases since the pre-industrial  
11 times and contribute the global warming. The atmospheric concentrations of CO<sub>2</sub>, CH<sub>4</sub> and N<sub>2</sub>O have  
12 increased from 278 ppm in 1750 to 391 ppm in 2011, by a factor of 2.5 from 722 ppb to 1803 ppb, and  
13 from 270 ppb to 342 ppb, respectively (IPCC, 2014a). The CO<sub>2</sub> concentration is increasing at the  
14 fastest observed decadal rate of change in the past ten years, and unfortunately the atmospheric  
15 greenhouse gas concentrations continue to rise. In order to maintain global temperature warming below  
16 2°C over the 21<sup>st</sup> century relative to pre-industrial levels, a reduction by 40% to 70% of global  
17 anthropogenic greenhouse gases emissions by 2050 compared to 2010, and increasing the existing  
18 biological carbon pools for carbon sequestration have been proposed (IPCC, 2014a).

19 Mangroves grow along the coastlines of most of the world's tropical and subtropical regions. Despite  
20 the limited area occupied by mangrove wetlands compared to terrestrial forests (0.32%, Mcleod et al.  
21 2011), these highly productive ecosystems are ecologically important on the global scale, and have  
22 been suggested to be responsible for 10-11% of global terrestrial carbon export to the ocean (Dittmar et  
23 al., 2006; Alongi, 2014a) and 11-14% of carbon sequestration in the world's oceans (Duarte et al., 2005;  
24 Alongi, 2014b). Recent studies have also highlighted the valuable role that mangrove wetlands play in  
25 carbon sequestration, and estimated the carbon burial rate in mangrove soil as 226 g C m<sup>-2</sup> yr<sup>-1</sup> from 34  
26 sites (Mcleod et al., 2011; Alongi, 2014b). Plants sequester CO<sub>2</sub> from the atmosphere through  
27 photosynthesis and store it in their biomass and as detritus in soil. The capability of mangrove plants to  
28 sequester CO<sub>2</sub> from atmosphere is therefore related to their net primary production (NPP). The overall

1 global mangrove NPP recently estimated by Bouillon et al. (2008) is  $1362.5 \text{ g C m}^{-2} \text{ yr}^{-1}$ , indicating that  
2 the  $\text{CO}_2$  sequestration capability of global mangrove is equal to  $4996 \text{ g CO}_2 \text{ m}^{-2} \text{ yr}^{-1}$ .

3 Being inter-tidal, mangrove wetlands are regularly flooded by incoming tides and their soils alternate  
4 between oxic and anoxic conditions, which favors microbial processes like nitrification, denitrification  
5 and methanogenesis that produce greenhouse gases. Numerous studies have recognized mangrove soil  
6 as sources of atmospheric greenhouse gases (Allen et al., 2007; Chauhan et al., 2008; Chen et al., 2010).  
7 The biogenic emission of greenhouse gases from mangrove soil to the atmosphere could be further  
8 enhanced by anthropogenic nitrogen input (Purvaja and Ramesh, 2001; Muñoz-Hincapié et al., 2002;  
9 Kreuzwieser et al., 2003; Chen et al., 2011). These gas emissions contribute to atmospheric warming  
10 and reduce the overall mitigation of global warming by mangroves. Therefore, the role that mangrove  
11 wetlands play in directly mitigating atmospheric warming is reflected by the exchange of greenhouse  
12 gases between mangrove ecosystem and the atmosphere as it relates to the ecosystem reducing or  
13 contributing to the atmospheric radiative forcing (Chmura et al., 2011). Assessments of the direct effect  
14 of mangrove wetlands in mitigating atmospheric warming on the ecosystem scale are important but still  
15 lacking. Although some studies have focused on the net ecosystem production (NEP) that combined the  
16 net primary production and gaseous carbon emissions from soil respiration in mangrove wetlands, for  
17 assessing the contribution of mangrove wetlands to atmospheric carbon gas exchange on the ecosystem  
18 scale (Golley et al., 1962; Komiyama, 2008), these studies are inadequate for assessing the contribution  
19 of mangroves to mitigating atmospheric warming as the contributions of  $\text{N}_2\text{O}$  emission and the  
20 warming effect of gas emissions were not taken into account.

21 According to a global carbon budget quantified by Bouillon et al. (2008), the mean soil  $\text{CO}_2$ -C flux  
22 represents ~20% of the mangrove NPP, indicating that the soil  $\text{CO}_2$  emission from mangrove wetland  
23 offsets 20% of the  $\text{CO}_2$  sequestration rate by mangrove plant. Although the atmospheric fluxes of  $\text{CH}_4$   
24 and  $\text{N}_2\text{O}$  are generally 2 or 3 orders of magnitude lower than  $\text{CO}_2$  flux in mangrove wetlands (Chen et  
25 al., 2010), their contributions to global warming could also be substantial and are worthy attention  
26 because they are more stable and have considerably higher radioactive forcing than  $\text{CO}_2$ , with direct  
27 global warming potential (GWP) 298 and 34 times as that of  $\text{CO}_2$ , respectively (Myhre et al., 2013).  
28 For instance, the annual mean fluxes of  $\text{CH}_4$  could be up to  $3899 \mu\text{g CH}_4 \text{ m}^{-2} \text{ h}^{-1}$  (Allen et al., 2007),  
29 with a warming effect of  $1161 \text{ g CO}_2 \text{ m}^{-2} \text{ yr}^{-1}$ . Our previous studies have demonstrated that some  
30 mangrove wetlands in South China subjected to exogenous nutrient inputs were significant sources of

1 greenhouse gases (Chen et al., 2010, 2011). The warming effect of N<sub>2</sub>O and CO<sub>2</sub> emissions in Mai Po  
2 mangrove in Hong Kong equated to 507 and 3279 g CO<sub>2</sub> m<sup>-2</sup> yr<sup>-1</sup>, respectively (Chen et al., 2011).  
3 Given that the NPP of the Mai Po mangrove was 1107 gDW m<sup>-2</sup> yr<sup>-1</sup> (Lee, 1989) and a carbon content  
4 of 44% in plants is assumed (Bouillon et al., 2008), the warming effect of gas emissions, totalled 70 %  
5 of the plant CO<sub>2</sub> sequestration. However, the greenhouse gas emissions from mangrove soils remain  
6 poorly characterized, and to what extent the gas emissions would offset the benefit of plant carbon  
7 sequestration is still unclear. In this study, we compared the warming effect of the gas emissions  
8 against the plant CO<sub>2</sub> sequestration rate to estimate the mitigating effect of mangrove wetland on  
9 atmospheric warming, and this balancing is based on the exchange of greenhouse gases between the  
10 mangrove ecosystem and the atmosphere.

11 The Jiulong River Estuary in South China is considered as the distribution centre of *Kandelia*  
12 *obovate* (Wang and Wang, 2007), which is wide-spread and well suited for use in restoration of areas  
13 of north Asia's coastline (Field, 1996). Previous studies have examined the production in this area and  
14 reported the litter fall production ranging from 852-1249 g m<sup>-2</sup> yr<sup>-1</sup>, similar to those in tropical  
15 mangroves (Lin et al., 1985; Lu et al., 1988; Ye et al., 2013); this finding indicates that the mangrove  
16 forests in this region are productively and ecologically important in the sequestration of atmospheric  
17 CO<sub>2</sub>. However, mangroves in this area are affected by a wide variety of human activities, including the  
18 mariculture that intermittently discharges pond effluents into the coastal water and potentially impact  
19 mangrove forest. Alongi et al. (2005) has reported rapid mineralization rates of soil carbon and  
20 nitrogen in this area; for instance, soil denitrification rate ranged from 1106 to 3780 mmol N<sub>2</sub> m<sup>-2</sup> d<sup>-1</sup>,  
21 and equated to 11-20% of total soil nitrogen inputs. These rapid mineralization processes suggest  
22 significant greenhouse gas emissions from the mangrove soils. In this study, spatial and seasonal  
23 variations in soil greenhouse gas emissions were investigated, and the warming effect of the gas  
24 emissions was quantified and then balanced with the plant CO<sub>2</sub> sequestration rate to estimate the  
25 mitigating effect of mangrove wetland on atmospheric warming. We also evaluated the effects of soil  
26 characteristics on greenhouse gas emissions. We hypothesized that (1) the mangrove soils in this region  
27 could be sources of greenhouse gases, and the gas emissions would to a certain offset the benefits of  
28 mangrove plants to mitigating atmospheric warming; (2) the contribution of the two trace gases, N<sub>2</sub>O  
29 and CH<sub>4</sub>, to atmospheric warming might be relevant and were considered; and (3) the mitigating  
30 effects might vary spatially among different mangrove sites.

1 **2 Materials and Methods**

2 **2.1 Study area**

3 Soil greenhouse gas emissions and plant CO<sub>2</sub> sequestration rates were studied in the subtropical  
4 mangroves in the Jiulong River Estuary. The region is subtropical has a mean annual temperature of  
5 20.9 °C, and most of the annual rainfall (1284 mm) is derived from summer typhoons. Tides are semi-  
6 diurnal, with an average range of 4 m (Alongi et al., 2005). The majority of the primary mangrove  
7 forests in this region were destroyed for aquaculture activity and sea wall construction. Plantation of *K.*  
8 *obovata* was carried out near Caoputou Village to protect the shoreline in 1960s and 1980s (Chen et al.,  
9 2007). Most mangrove forests (~32 ha) in this region now are located on the southwestern shore  
10 (Alongi et al., 2005), and are narrow fringing forests due to the destruction. The mangrove soils are  
11 mainly composed of silt and clay (Alongi et al., 2005).

12 As some mangrove dominated shores were subjected to erosion, *Spartina alterniflora* invasion or  
13 garbage from upstream, the present study chose sites in good conditions for comparison study so as to  
14 eliminate such exogenous impacts. Samplings were carried out in three mangrove sites (Fig. 1) located  
15 near Caoputou Village (CPT, 24°23'40.89"N, 117°54'42.90"E), Xiaguo Village (XG, 24°23'36.24"N,  
16 117°55'19.48"E) and on Haimen Island (HMI, 24°24'24.05"N, 117°56'28.51"E). CPT mangrove was a  
17 rehabilitated and now mature *K. obovata* forest planted in 1962 at the high intertidal zone on the south  
18 bank with a density of 1.0 stem m<sup>-2</sup> (Chen et al., 2007) and had the highest canopy height (7.8m). XG  
19 mangrove was at the mid intertidal zone, based on its intertidal elevations and the intertidal zonation  
20 scheme in Jiulong River Estuary, as described by Chen et al. (2006); this mangrove was composed of  
21 natural and dense *K. obovata* tress (6.2m-high, 1.7 stem m<sup>-2</sup>). The lowest vegetation density (0.9 stem  
22 m<sup>-2</sup>) and canopy height (5.5m) occurred in the mid-low natural mangrove site on Haimen Island. The  
23 width of each sampling area was ~40 m, ~90 m and ~90 m from the landward to seaward fringes in the  
24 three mangrove sites, respectively, and the sampling length was around 20 m for each site.

25 **2.2 Soil to atmosphere greenhouse gas fluxes**

26 Soil to atmosphere fluxes of greenhouse gases were quantified in January, April, August and October  
27 2012, representing the seasons winter, spring, summer and autumn, respectively. All samplings were  
28 conducted two hours before the lowest ebb tide during the daytime as the study areas are subject to  
29 semi-diurnal tides and the exposure times of mangrove wetlands are relative short. The tidal range,

1 tidal flooding and exposure duration were comparable among the sampling days and the three  
2 mangrove sites. Nine replicate plots were chosen at each mangrove site during each sampling campaign  
3 to achieve more accurate estimation of gas emissions because of high levels of spatial variation, even  
4 on a small scale (Allen et al., 2007; Chen et al., 2010).

5 Gas flux in this study was quantified using the static (closed) chamber technique followed by gas  
6 chromatography as described by Chen et al. (2010). The circular and transparent chambers were placed  
7 between the trees, in locations without mangrove seedlings, aboveground roots or litter fall to avoid the  
8 influences of these factors on gas fluxes, and the open end of the chamber was inserted 3 cm into the  
9 soil. The chambers had a basal area of 0.025 m<sup>2</sup>, an internal volume (headspace volume over the soil)  
10 of 1.25 l, and did not include a fan (Corredor et al., 1999; Bauza et al., 2002). The volume/basal area  
11 ratio was similar to those (11 vs. 0.02 m<sup>2</sup>) used by previous researchers (Corredor et al., 1999; Bauza et  
12 al., 2002) which is sufficiently small for the rapid increase in gas concentrations. A comparison study  
13 by Moore and Roulet (1991) showed that the fluxes measured using static chambers (0.053 m<sup>2</sup> basal  
14 area and 40cm height) has no difference from those using dynamic chamber (the insider air was  
15 circulated) with similar height, indicating that the gas mixing in the static chamber was as efficient as  
16 the dynamic chamber even with a height of 40 cm. The chambers used in this study have a hole at their  
17 top. When pushing the chambers into soils, these holes were left open to eliminate the pressure  
18 disturbance, and were closed using rubber stoppers for first gas collection. The deployment time was  
19 set to 30 minutes, with sampling at 10-minute intervals. At each sampling time, a 5-ml gas sample was  
20 collected with a hypodermic needle attached to a 10-ml glass syringe from the chamber and then  
21 injected into a 20-ml gas sampling bag. Previous study by Chen et al. (2012) revealed that gases were  
22 continuously released and their concentrations were significantly and linearly related to the deployment  
23 time (with regular sampling at 15-20 minutes' intervals), even in event that the gas concentrations in  
24 the chamber were very high. In this study, the gas flux was much lower than those reported by Chen et  
25 al. (2010), and the dimension of sampling chamber was the same as that used by them. Therefore, the  
26 samplings at 10-minute intervals were appropriate and the rapid gas accumulations in the chamber  
27 (especially for CO<sub>2</sub>) would not result in significant underestimation of gas flux.

28 Gas concentrations were analysed in parallel with a gas chromatography system (7890A, Agilent  
29 Technologies, Santa Clara, California, USA) configured with a single channel and two detectors, by  
30 comparing the peak areas of samples against an Agilent Greenhouse Gas Checkout Sample (1 ppm

1 N<sub>2</sub>O, 5 ppm CH<sub>4</sub> and 600 ppm CO<sub>2</sub> in N<sub>2</sub>). The N<sub>2</sub>O and CH<sub>4</sub> concentrations were determined with a  
2 <sup>63</sup>Ni electron capture detector and a flame ionization detector (FID), respectively. The CO<sub>2</sub>  
3 concentration was analyzed by FID after methanization. During the measurement, the standard sample  
4 was analyzed in every 15-20 samples to ensure data quality. The relative standard deviations of  
5 replicate standard measurements were 3.6%, 2.5% and 3.4% for N<sub>2</sub>O, CH<sub>4</sub> and CO<sub>2</sub>, respectively.

6 The soil to atmosphere fluxes of greenhouse gases were calculated using the following formula:

7 
$$F_m = V\Delta M/A\rho$$

8 where  $F_m$  is the interfacial gas flux (mol m<sup>-2</sup> h<sup>-1</sup>),  $V$  is the internal air volume (m<sup>3</sup>) in the chamber after  
9 being placed,  $\Delta M$  (h<sup>-1</sup>) is the change in gas concentration in the container,  $A$  is the surface area of the  
10 soil (m<sup>2</sup>) and  $\rho$  is the volume of per mol gas (m<sup>3</sup> mol<sup>-1</sup>). During each sampling, the open air temperature  
11 was simultaneously measured with a mercury thermometer to calculate the  $\rho$  value.

### 12 **2.3 Sampling and analysis of soil**

13 Soil parameters were also measured at these sampling sites in summer to examine their relationship  
14 with gas fluxes as the fluxes have been found to be higher in summer in subtropical mangroves (Chen  
15 et al., 2012) which is conducive this examination. Soil redox potential ( $E_h$ ) under the chamber was  
16 measured using a pH/ $E_h$  meter (WP-81, TPS, Australia) after gas sampling, by inserting the platinum  
17 probe directly into the soil at a depth of 5 cm from the surface. A soil sample to a depth ~5cm was  
18 collected at each plot using a steel tube (i.d. 1.75cm) with the open end sharpened, and the bulk density  
19 was estimated from the soil volume and 105 °C oven-dried weight. Independent soil cores to a depth of  
20 15 cm (6 cores for each mangrove site) were then collected using hand-held PVC corers. Soil organic  
21 carbon (OC) concentration was analyzed using rapid dichromate oxidation procedure. Total Kjeldahl  
22 nitrogen (TKN) content after Kjeldahl digestion and NH<sub>4</sub><sup>+</sup>-N and NO<sub>3</sub><sup>-</sup>-N contents in the KCl (2M)  
23 extracts were measured by the Continuous Flow Analyzer (CFA, Futura II, Alliance Instruments). All  
24 soil analyses were based on the standard methods for soil analyses described by Page et al. (1982), and  
25 the data were expressed in terms of 105 °C oven-dried weight.

26 In addition to the soil analysis, salinity of the soil porewater was only measured at the seaward fringe  
27 of each mangrove site (three replicates for each site) as porewater sample was not available for all  
28 sample sites. The salinity was measured using a pocket refractometer (0–100 parts per thousands,

1 Atago PAL-06 S, Japan). Such measurement does not reveal the salinities within the mangrove  
2 wetlands, but could reflect the salinity gradient among the three mangrove sites.

### 3 **2.4 Plant CO<sub>2</sub> sequestration rate**

4 Plant CO<sub>2</sub> sequestration rate was calculated from the NPP, the carbon content and the formula weights  
5 of CO<sub>2</sub> and C. Mangrove NPP was estimated using the litter fall technique proposed by Teas (1979),  
6 which postulates that 1/3 of mangrove NPP is returned as litter fall. A global extrapolation by Bouillon  
7 et al. (2008) also showed a clear relationship between litter fall and wood production and further  
8 suggested that litter production amounts to ~32% of the total mangrove NPP including root production.  
9 This rapid and direct method was also applied in other studies (e.g. Lee, 1990; Alongi, 2009), but its  
10 accuracy depends on the availability of a good conversion factor (Odum et al., 1982). In this study, a  
11 conversion factor 2.75 was applied for the estimation of NPP, which was calculated from previously  
12 reported NPP (including root production) and the concurrent litter fall production of *K. obovata*  
13 mangrove in the Jiulong River Estuary (Lin et al., 1985). The mean carbon content in various plant  
14 fractions was 47% for *K. obovata* in the Jiulong River Estuary (Zheng et al., 1995).

15 Litter fall samples were collected using metal-framed litter traps ( $\Phi=70$  cm for surface area, 30 cm  
16 depth) with 2-mm mesh. Nine traps were placed randomly under canopies at similar height above the  
17 maximum tide level (1.5m above the sediment) at each mangrove site. Trap contents were collected  
18 monthly and sorted into the categories of leaves, woods and reproduction (flowers and propagules), and  
19 were then dried at 60 °C to a constant weight and weighed. The total litter fall production was  
20 expressed as the sum of these components.

### 21 **2.5. Mitigating effect of the mangrove ecosystem on atmospheric warming**

22 The gas fluxes were converted to CO<sub>2</sub>-equivalent fluxes to indicate their respective contributions to  
23 global warming using the GWP value of each gas (1, 34 and 298 for CO<sub>2</sub>, CH<sub>4</sub> and N<sub>2</sub>O, respectively,  
24 over a 100-year timeframe) according to Myhre et al. (2013). The annualized warming effect of gas  
25 emissions at each site was then compared against the CO<sub>2</sub> sequestration rate of plants to estimate the  
26 ecosystem mitigation effect. Net ecosystem productions of the three mangrove sites were also  
27 estimated by subtracting soil respiration rate from NPP, and the soil respiration rate expressed as the  
28 total carbon-gas flux was calculated as the sum of CO<sub>2</sub>-C and CH<sub>4</sub>-C fluxes.



1 The annual fluxes of the three gases and their warming effects were calculated from the fluxes  
2 measured in the four seasons during exposure periods for each site (n=36) or the three sites (n=108).  
3 This estimation was subjected to the assumptions that the fluctuations in soil-atmosphere fluxes were  
4 insignificant during exposure period and the water-atmosphere fluxes during inundation were similar to  
5 those during exposure. The assumption was based on the following findings from previous studies  
6 (Chang and Yang, 2003; Bouillon et al., 2008; Tong et al., 2013). Although tidal effect on gas flux was  
7 observed during the exposure in previous study (Chang and Yang, 2003), the results were inconsistent  
8 across different measurement campaigns. The study by Chang and Yang (2003) showed that gas fluxes  
9 in a *K. obovate* wetland had significantly more emission after ebb tide than before flooding in August  
10 1996, but the fluxes before flood were significantly higher than that after ebb tide in May and August  
11 1998. Our preliminary study also showed that the temporal variation in gas flux was insignificant  
12 during the exposure (unpublished data). On the other hands, gases released from soils could be  
13 dissolved in tides during the flood, partial of which is released to atmosphere from the seawater (Tong  
14 et al., 2013). Bouillon et al. (2008) reported that there was no significant difference in the CO<sub>2</sub>  
15 emission between exposed and inundated periods. A diurnal measurement of CH<sub>4</sub> and N<sub>2</sub>O fluxes in an  
16 estuarine marsh in Fujian Province also showed no clear difference between the inundation and  
17 exposure periods (Tong et al., 2013). Therefore, the calculations of annual emissions from fluxes  
18 during exposure time obtained from imitated measurement would not affect the findings of the present  
19 study.

20 Since the carbon sequestration by mangrove plants is estimated based on net primary production, the  
21 CO<sub>2</sub> released due to autotrophic respiration of mangrove roots should not be included. Although CO<sub>2</sub>  
22 emissions from some soils include the CO<sub>2</sub> efflux from plant roots and heterotrophic respiration  
23 (Lovelock, 2008; Bulmer et al., 2015), Komiyama et al. (2008) concluded that most metabolic  
24 respiration from mangrove roots is considered to be released through the lenticels and underground  
25 roots of mangroves may only make a small contribution to the soil respiration when soil respiration  
26 chambers are placed where there is no pneumatophore, because the aerenchyma tissues of underground  
27 roots are connected with lenticels on pneumatophores, prop roots, and buttresses above the ground  
28 (Tomlinson, 1986). In the present study, *K. obovate* develops no pneumatophore. The sampling points  
29 located between the trees, and there was no obvious root biomass observed in the soil under the

1 chambers. Thus, the CO<sub>2</sub> flux was more likely to represent metabolism of microbes (including  
2 microalgae) in this study.

### 3 **2.5 Statistical analysis**

4 The normality of variables was checked using the Kolmogorov-Smirnov test, and the gas fluxes that  
5 did not follow a normal distribution were transformed to improve normality and homoscedasticity prior  
6 to analysis. Two-way ANOVA was used to test the differences in greenhouse gas flux among the four  
7 seasons and the three sites. If the difference was significant ( $p < 0.05$ ), a post hoc Tukey test was then  
8 used to determine what the difference was. Differences in litter fall production and soil characteristics  
9 among different mangroves were compared by using one-way ANOVA. Pearson correlation  
10 coefficients were calculated to determine the relationships between soil properties and greenhouse gas  
11 fluxes in the summer. All statistical analyses were performed using SPSS 18.0 for Windows (SPSS Inc.,  
12 USA).

## 13 **3 Results**

### 14 **3.1 Soil to atmosphere greenhouse gas fluxes**

15 The soil to atmosphere N<sub>2</sub>O fluxes ranged from -1.6 to 50.0  $\mu\text{g m}^{-2} \text{h}^{-1}$  in Jiulong River Estuary (Fig. 2),  
16 with annualized CO<sub>2</sub>-equivalent flux ranging from 24.3 to 88.9  $\text{g CO}_2 \text{ m}^{-2} \text{yr}^{-1}$  in the three mangrove  
17 sites. According to the two-way ANOVAs, N<sub>2</sub>O flux and its CO<sub>2</sub>-equivalent flux (proportional to gas  
18 flux) varied significantly among the three mangrove sites ( $F=10.63$ ,  $p=0.000$ ) and among the four  
19 seasons ( $F=17.21$ ,  $p < 0.001$ ). However, no significant interaction was found between these two factors  
20 ( $F=1.28$ ,  $p > 0.05$ ). The highest N<sub>2</sub>O flux was measured in the summer, while the lowest was observed  
21 in the winter and autumn. XG mangrove had higher N<sub>2</sub>O flux than the other two sites with similar  
22 fluxes.

23 The CH<sub>4</sub> flux and its CO<sub>2</sub>-equivalent flux showed significantly spatial ( $F=15.36$ ,  $p < 0.001$ ) and  
24 seasonal ( $F=26.03$ ,  $p < 0.001$ ) variations. The lowest flux was -1.39  $\mu\text{g m}^{-2} \text{h}^{-1}$  (measured in HIM in  
25 winter), while positive fluxes in other measurements indicated sources of CH<sub>4</sub> in the mangroves.  
26 Significant interaction was also found between the two factors ( $F=3.83$ ,  $p < 0.001$ ). The flux was  
27 significantly higher in summer while the winter flux was generally the lowest. However, the highest

1 value of CH<sub>4</sub> flux was measured in autumn (in XG), when the CH<sub>4</sub> flux had a greatly spatial variation  
2 (40.5-5360.5 ug m<sup>-2</sup> h<sup>-1</sup>).

3 For CO<sub>2</sub>, the flux also varied significantly among the mangrove sites (F=10.24, p<0.001) and the  
4 four seasons (F=73.25, p<0.001), and the interaction between these two factors was also significant  
5 (F=4.42, p<0.01). Sinks of CO<sub>2</sub> were measured in the winter in the three mangrove sites; however,  
6 mangrove soils in the warmer seasons acted as significant CO<sub>2</sub> sources. Significantly higher CO<sub>2</sub> flux  
7 was measured in the summer, varying from 108.0 to 511.8 mg m<sup>-2</sup> h<sup>-1</sup>, irrespectively the mangrove sites.  
8 The annual mean CO<sub>2</sub> fluxes were 1015.3 g m<sup>-2</sup> yr<sup>-1</sup>, 1470.3 g m<sup>-2</sup> yr<sup>-1</sup> and 307.4 g m<sup>-2</sup> yr<sup>-1</sup> in CPT, XG  
9 and HMI, respectively.

### 10 **3.2 Soil characteristic in summer and their relationship with gas fluxes**

11 HMI mangrove had slightly higher porewater salinity while there was no difference in salinity between  
12 the other two sites (Fig. 3). Soil characteristics, except NO<sub>3</sub><sup>-</sup>-N concentration, bulk density and E<sub>h</sub>,  
13 varied significantly among the three mangrove sites in Jiulong River Estuary (Fig. 3). Lower soil water  
14 content was measured in CPT than in other two sites (p<0.01). Soil NH<sub>4</sub><sup>+</sup>-N content was lower in CPT  
15 and HMI (p<0.05). XG mangrove site had the highest soil OC and TKN concentrations and the lowest  
16 concentrations were measured at HMI. Among the measured soil parameters measured, NH<sub>4</sub><sup>+</sup>-N, OC  
17 and TKN concentrations were positively correlated with fluxes of the three gases and the total CO<sub>2</sub>-  
18 equivalent flux (Table 2). No significant effect was detected for other soil parameters on the gas fluxes.

### 19 **3.3 Litter fall and net primary productions**

20 Litter fall productions ranged from 771 gDW m<sup>-2</sup> yr<sup>-1</sup> to 1565 gDW m<sup>-2</sup> yr<sup>-1</sup> (Table 2) in Jiulong River  
21 Estuary mangroves. Leaf fall and reproduction components were 550 and 514 gDW m<sup>-2</sup> yr<sup>-1</sup>,  
22 comprising 44% and 41% of the total litter fall production, respectively. Using the conversion factor  
23 2.75, the net primary production of mangrove calculated from litter fall production was 2119-4306  
24 gDW m<sup>-2</sup> in the three mangrove sites. Due to its lower leaf and twig productions, the litter fall  
25 production and NPP measured in HMI were lower compared to the other two mangrove sites,.

### 26 **3.4 Mitigating effect of the mangrove ecosystem on atmospheric warming**

27 In case of high primary productions and low soil carbon gas emissions, the mangrove wetlands in this  
28 study had NEP rates ranging from 912 to 1746 g C m<sup>-2</sup> yr<sup>-1</sup> (Table 3), with a mean as 1358 g C m<sup>-2</sup> yr<sup>-1</sup>.

1 The carbon gas emission accounted for 8.4-22.7 % of the total mangrove NPP, and the CH<sub>4</sub> made a  
2 negligible contribution (0.2 %-3.4 %) to the total carbon gas emission.

3 Based on the CO<sub>2</sub>-equivalent fluxes of the three gases (Fig. 2), the total CO<sub>2</sub>-equivalent fluxes  
4 indicating the warming effect of gas emission, were 1125, 2200 and 340 g CO<sub>2</sub> m<sup>-2</sup> yr<sup>-1</sup>, respectively,  
5 in the three sites (Table 3). The two trace gases, CH<sub>4</sub> and N<sub>2</sub>O, contributed as much as 33.2% of the  
6 total CO<sub>2</sub>-equivalent flux in XG, but contributed less than 10% in the other two sites. When balancing  
7 the warming effect of the gases and the concurrent CO<sub>2</sub>-sequestration rate of the mangrove plants, the  
8 effect of the mangrove ecosystem on atmospheric warming was equal to -4708 g CO<sub>2</sub> m<sup>-2</sup> yr<sup>-1</sup> (Table 4),  
9 further indicating the mangrove wetland as an affirmative role in mitigating global warming.

#### 10 **4 Discussion**

11 The subtropical *K. obovata* mangrove forest in Jiulong River Estuary had high net primary  
12 productivity, close to or higher than amounts reported in tropical regions, and higher than the global  
13 mean production (Bouillon et al., 2008). This is consistent with the summary by IPCC (2014b), which  
14 shows that some subtropical mangroves have higher growth rates than the tropical. This high NPP and  
15 low carbon gas emissions from soil in the present study indicated that the mangrove wetlands have  
16 strong sequestration capability of atmospheric carbon on the ecosystem scale. The NEP in Jiulong  
17 River Estuary (912-1747 gC m<sup>-2</sup> yr<sup>-1</sup>) was also higher than the global mean value of 1100 g C m<sup>-2</sup> yr<sup>-1</sup>  
18 reported by Bouillon et al. (2008), and those estimated in a *Rhizophora mangle* forest (561 gC m<sup>-2</sup> yr<sup>-1</sup>)  
19 in Puerto Rico (Golley et al., 1962) and in the mangrove in western Florida Everglades (1170 gC m<sup>-2</sup>  
20 yr<sup>-1</sup>, Barr et al., 2010). Although CH<sub>4</sub> emission was also significant in the estuarine mangrove wetlands  
21 in this study, it accounted for a small proportion (0.2-3.4%) of the soil gaseous carbon emission.

22 The soil to atmosphere gas fluxes in the Jiulong River Estuary fell within the ranges previously  
23 reported for other mangrove wetlands (Chauhan et al., 2008; Chen et al., 2010). The results further  
24 demonstrated that mangrove soils can be sources of greenhouse gases which contribute to the warming  
25 effect. With both plant CO<sub>2</sub> sequestration (showed in Table 3) and soil gas emissions considered,  
26 mangrove wetlands were small sources for CH<sub>4</sub> and N<sub>2</sub>O (0.08–0.30 g N<sub>2</sub>O m<sup>-2</sup> yr<sup>-1</sup> and 0.25–18.86 g  
27 CH<sub>4</sub> m<sup>-2</sup> yr<sup>-1</sup>) and significant CO<sub>2</sub> sinks at rates from -6405 g CO<sub>2</sub> m<sup>-2</sup> yr<sup>-1</sup> to -3345 g CO<sub>2</sub> m<sup>-2</sup> yr<sup>-1</sup>.  
28 However, when considering their warming effect, soil greenhouse gas emissions accounted for 9.3-32.7

1 % of the plant CO<sub>2</sub> sequestration rate in this study, indicating that greenhouse gas emissions from  
2 mangrove soils could reduce the benefit of mangrove plants. The net mitigating effect of the mangrove  
3 ecosystem on atmospheric warming was estimated to be from -6295 g CO<sub>2</sub> m<sup>-2</sup> yr<sup>-1</sup> to -3312 g CO<sub>2</sub> m<sup>-2</sup>  
4 yr<sup>-1</sup> in the three mangrove sites. As the three sites in this study locate at different areas (north-shore  
5 mangrove and island mangrove) in the estuary and cover both the rehabilitated and natural sites in this  
6 region, we considered they are representative of the larger entire estuary. The mitigation effect of the  
7 mangroves in Jiulong River Estuary could be estimated as 4708 g CO<sub>2</sub> m<sup>-2</sup> yr<sup>-1</sup>, suggesting that  
8 mangrove wetland in this region, in term of the radioactive forcing, is important sinks of atmospheric  
9 CO<sub>2</sub>. Given that the CO<sub>2</sub> sequestration capability of global mangrove is equals to 4996 g CO<sub>2</sub> m<sup>-2</sup> yr<sup>-1</sup>  
10 and that soil CO<sub>2</sub> flux offsets 20% of the CO<sub>2</sub> sequestration rate (Bouillon et al., 2008), the mitigating  
11 effect of global mangrove is assumed to be less -4000 g CO<sub>2</sub> m<sup>-2</sup> yr<sup>-1</sup> when the warming effect of non-  
12 CO<sub>2</sub> emission is considered. In the present study, the greenhouse gas fluxes were measured at the clear  
13 surface soils, and the fluxes were mainly derived from soil metabolisms. If Take into account of the  
14 CO<sub>2</sub> emissions from other source like decompositions of litter fall and dead wood as important carbon  
15 pools in the mangroves (IPCC, 2014b), the contribution of greenhouse gas emissions would be more  
16 significant. Alongi (2014a) suggested that the CO<sub>2</sub> loss to air due to faunal respiration could also be  
17 considerable. Further studies are therefore needed with consideration of CO<sub>2</sub> emissions from these  
18 sources. Globally, mangrove NPP decreases with increasing latitude and the highest litter fall rates  
19 occur in the tropical areas (Bouillon et al., 2008; Alongi, 2009). Some studies on the other hand  
20 reported low greenhouse gas emissions from soils in tropical mangroves (Chen et al., 2014; Nóbrega et  
21 al., 2016). These suggest that the tropical mangrove could be more relevant in mitigation global  
22 warming, and their roles deserve detailed studies as the tropical mangroves (e.g. Indonesian mangrove)  
23 comprise the majority of global mangroves (Giri et al., 2010).

24 Despite their low fluxes compared to CO<sub>2</sub>, the contributions of the trace CH<sub>4</sub> and N<sub>2</sub>O gases are also  
25 relevant (up to 33.2%) to global warming in the mangrove wetlands considering their warming effect.  
26 When subjected to anthropogenic nutrient inputs, the emissions of these two gases and CO<sub>2</sub>, could be  
27 more considerable (Muñoz-Hincapié et al., 2002; Chen et al., 2011), which would largely enhance their  
28 contributions to the warming effect. High gas emission rates have been reported from mangrove soils,  
29 and N<sub>2</sub>O and CH<sub>4</sub> contributed twice the global warming potential as CO<sub>2</sub> in the Futian mangrove in  
30 South China which receives discharges and anthropogenic nutrient inputs from Pearl River Delta and

1 nearby polluted rivers (Chen et al., 2010). As the fluxes of the CH<sub>4</sub> and N<sub>2</sub>O are not still poorly  
2 quantified, their fluxes from mangrove soils therefore should receive more attentions and should also  
3 be documented in addition to that of CO<sub>2</sub> to quantify the contribution of greenhouse gas emissions  
4 from mangrove soil, especially for those receiving exogenous nutrients. Liu and Greaver (2009) have  
5 also suggested that although the addition of N increased the global terrestrial C sink, CO<sub>2</sub> sequestration  
6 could be largely offset by N stimulation of global CH<sub>4</sub> and N<sub>2</sub>O emissions. N<sub>2</sub>O was found to  
7 dominate the total warming effect of gas emissions in some agro-ecosystems (Mosier et al., 2005).

8 Mangrove production, gas fluxes and the ecosystem mitigation effect in this study varied spatially  
9 with mangrove sites, with a lower fluxes and mitigation effect observed at HMI due to a much lower  
10 plant CO<sub>2</sub> sequestration rate. The variation was greater for gas fluxes, with CO<sub>2</sub> flux ranging between  
11 as low as 307 g m<sup>-2</sup> yr<sup>-1</sup> and up to 1470 g m<sup>-2</sup> yr<sup>-1</sup>, and even greater spatial variation was found in CH<sub>4</sub>  
12 flux. Warming effect of the gas emissions in XG was about 6 times of that in HMI. Moreover, gas  
13 fluxes also varied seasonally. Such spatial and seasonal variations in gas fluxes, which are suggested to  
14 be mainly due to fluctuations in temperature in subtropical mangroves and moisture in tropical  
15 mangroves (Chen et al., 2012), therefore should be taken into account for the inventory of greenhouse  
16 gas emissions. We also measured a lower primary production accompanied by low gas emission rates  
17 in this study. Similarly, the soil respiration rate was found to be correlated with litter fall production on  
18 a large range of latitude extending from 27°N to 37°S (Lovelock, 2008). This pattern suggested that the  
19 more CO<sub>2</sub> is sequestered by mangroves, the more substantial the effect of the soil greenhouse gas  
20 emissions might be, and their warming effect should not be ignored.

21 The spatial variations of greenhouse gas fluxes could be partly attributed to the differences in soil  
22 characteristics among the study sites as the gas fluxes are related to mangrove soil properties including  
23 concentrations of organic carbon, total and inorganic nitrogen, bulk density, salinity and redox potential  
24 (Purvaja and Ramesh 2001; Allen et al., 2007; Chen et al., 2010, 2012). The higher gas fluxes were  
25 attributed to higher soil organic carbon, nitrogen and NH<sub>4</sub><sup>+</sup>-N concentrations in mangrove soils (Table  
26 2). This is similar to the findings in our previous studies in other subtropical *K. obvota*-dominated  
27 wetlands in South China (Chen et al., 2010). Positive soil E<sub>h</sub> in the mangrove soil and significant  
28 correlation between N<sub>2</sub>O flux and soil NH<sub>4</sub><sup>+</sup>-N concentration indicated the importance of nitrification  
29 process in mangrove soil that is responsible for the N<sub>2</sub>O production. Nevertheless, the results didn't  
30 exclude the potential of denitrification for N<sub>2</sub>O production as the soil E<sub>h</sub> in this study was below 350

1 mv, below which denitrification usually starts (Pitty, 1979). Similarly to some other studies (e.g. Allen  
2 et al., 2007; Chen et al., 2010), high soil  $\text{NH}_4^+$ -N concentration also enhanced the  $\text{CH}_4$  emission into  
3 the atmosphere in this study, probably due to the inhibition effect of soil  $\text{NH}_4^+$ -N on  $\text{CH}_4$  oxidation  
4 under high concentration (Bosse et al., 1993). Methane emission from the coastal soils has been known  
5 to be limited by high salinity as the presence of high sulphate in coastal soils allows sulphate-reducing  
6 bacteria to outcompete methanogens for energy sources (Biswas et al., 2007; Poffenbarger et al., 2011;  
7 IPCC, 2014b). Lower soil  $\text{CH}_4$  flux and higher porewater salinity in HMI was also consistent with such  
8 inhibition effect.

9 Soil temperature and soil moisture were the two key environmental factors affecting soil greenhouse  
10 gases fluxes and driving their seasonal and spatial variations (Lovelock, 2008; Pongparn et al., 2009;  
11 Chen et al., 2012). The  $\text{CO}_2$  flux can be suppressed by elevated soil moisture (Pongparn et al., 2009;  
12 Chen et al., 2014; Lewis et al., 2014), because the high degree of soil saturation reduces the exposure  
13 of soil to air and decomposition rate of organic matter. On the opposite, the high moisture can stimulate  
14 anaerobic respiration in soils and enhance the  $\text{CH}_4$  flux (Lu et al., 1998). However, in this study, the  
15 soil water moisture fluctuated in a narrow range and had no significant impact on gas fluxes. No  
16 significant correlations were found between soil  $E_h$  (indicator of oxidation-reduction potential) and the  
17 gas fluxes in the present study, and flux variabilities were more related to the C/nutrient availabilities.  
18 Variations in soil temperature have been reported to influence gas fluxes (Lovelock, 2008; Pongparn  
19 et al., 2009; Chen et al., 2012; Leopold et al., 2015), and higher temperature generally induce higher  
20 gas fluxes. Although not measured in this study, we consider that soil temperature drives the seasonal  
21 variation in gas fluxes in the mangroves in Jiulong River Estuary.

22 Some other studies in saltmarshes also quantified the potential global warming feedbacks based on  
23 the soil carbon sequestration rate and non- $\text{CO}_2$  gas emission rates (e.g. Chmura et al., 2011; Yuan et al.,  
24 2014). Considering the rapid soil accumulation rate in the mangrove wetland in Jiulong River Estuary  
25 ( $33.7 \text{ mol C m}^{-2} \text{ yr}^{-1}$ , equivalent to  $1482.8 \text{ g CO}_2 \text{ m}^{-2} \text{ yr}^{-1}$ , Alongi et al., 2005), the global warming  
26 potential of this mangrove area is determined to be  $\sim 1190 \text{ g CO}_2 \text{ m}^{-2} \text{ yr}^{-1}$  (the  $\text{CO}_2$ -equivalent flux of  
27  $\text{CH}_4$  and  $\text{N}_2\text{O}$  fluxes had a sum of  $290 \text{ g CO}_2 \text{ m}^{-2} \text{ yr}^{-1}$ ). This value was higher than those in northern  
28 and northwestern Atlantic saltmarshes estimated in the growing season ( $574\text{-}1000 \text{ g CO}_2 \text{ m}^{-2} \text{ yr}^{-1}$ ,  
29 Chmura et al., 2011) and in the marshes in eastern China ( $114\text{-}1130 \text{ g CO}_2 \text{ m}^{-2} \text{ yr}^{-1}$ , Yuan et al., 2014).  
30 Unlike the salt marsh, the carbon accumulation of which through plant growth is roughly balanced by

1 losses through grazing, decomposition and fire (IPCC, 2006, 2014b), a majority of C captured by  
2 mangrove plant is stored in their biomass and as detritus in soil. Taking these carbon sequestrations  
3 into account, it can be suggested that the mangrove wetland plays a more substantially potential role in  
4 mitigating global warming.

5 Mangrove ecosystem is open and dynamic in the carbon processes. Majority of mangrove NPP is  
6 stored in plant biomass; partial litter fall production can be decomposed, retained and buried in the  
7 mangrove soil, while the rest is exported to the adjacent coastal water. On the other hand, mangrove  
8 ecosystem could also bury the exogenous carbon during flooding periods (Twilley et al., 1992,  
9 Bouillon et al., 2008). Mangrove ecosystem also loses significant organic carbon in dissolved (DOC)  
10 and particulate forms with tidal water (Dittmar et al., 2006; Bouillon et al., 2008; Ye et al., 2011),  
11 while the majority of carbon export from mangroves might occur as dissolved inorganic carbon (DIC,  
12 Bouillon et al., 2008; Maher et al., 2013). Alongi (2014a) recently suggested that loss of DIC in  
13 mangrove soils via subsurface pathways to adjacent waterways is large, at a potential rate up to 40% of  
14 annual primary production. These processes determine the carbon sequestration potential within  
15 mangrove wetland, which is related to the potential of mangrove wetland in reducing carbon gas  
16 emissions and mitigating global warming, as the loss of carbon pool is equivalent to relevant carbon  
17 dioxide emission to atmosphere (IPCC 2014b). The present study assessed the role of mangrove  
18 wetland in mitigating atmospheric warming based on the greenhouse gas exchange between mangrove  
19 ecosystem and atmosphere. Considering the potential of carbon sequestration of mangrove ecosystem  
20 in reducing carbon gas emissions, we further propose assessment of the potential of mangrove wetland  
21 in mitigating global warming by considerations of both the greenhouse gas emissions and the carbon  
22 sequestration potential as a synthesis of the above comprehensive carbon processes.

## 23 **5 Conclusions**

24 The present study showed that mangrove soils are significant sources of greenhouse gases, and the  
25 warming effect of gas emissions could partially offset the benefit of plant CO<sub>2</sub> sequestration to  
26 mitigating atmospheric warming. We therefore propose that any assessment of the mitigation effect on  
27 atmospheric warming should take into account soil greenhouse gas emissions. The contributions of  
28 trace amounts of CH<sub>4</sub> and N<sub>2</sub>O gases to the warming effect are also significant and should not be



1 ignored in mangrove wetlands, especially in those nutrient-enriched. Moreover, the temporal and  
2 spatial variations in gas fluxes and plant CO<sub>2</sub> sequestration rate should be taken into account to  
3 improve the accuracy of inventory of greenhouse gas emissions and the estimates of mitigating effect  
4 of mangroves on atmospheric warming.

#### 5 **Author contribution**

6 G. Chen designed the experiments, and S. Chen and D. Yu carried out the field sampling and  
7 laboratory analysis. B. Chen performed the data analysis. G. Chen wrote the first draft of the  
8 manuscript, and all authors contributed substantially to revisions.

#### 9 **Acknowledgements**

10 The work described in this paper was supported by the National Natural Science Foundation of China  
11 (41206108) and the Fujian Province Science and Technology Plan Project (2014Y0067). The 973  
12 Program (2015CB452905) and Science Research Foundation of the Third Institute of Oceanography,  
13 SOA (2014011), also provided support. The authors have no conflict of interest. The authors are  
14 grateful to Ms. Y.P. Chen, Dr. X.Q. Zheng and Mrs. Q.Y. Lin for their assistance with field sampling  
15 and laboratory analysis, as well as Mr. Z.Y. Xue for assistance with mangrove site selection. We also  
16 thank Dr. Changhua Weng for English edit.

#### 17 **References**

- 18 Allen, D.E., Dalal, R.C., Rennenberg, H., Meyer, R.L., Reeves, S., and Schmidt, S.: Spatial and  
19 temporal variation of nitrous oxide and methane flux between subtropical mangrove sediments and  
20 the atmosphere, *Soil Biol. Biochem.*, 39, 622-631, 2007.
- 21 Alongi, D.M.: Carbon cycling and storage in mangrove forests, *Annu. Rev. Mar. Sci.*, 6:195–219,  
22 2014a.
- 23 Alongi, D.M.: Carbon sequestration in mangrove forests, *Carbon Management*, 3(3), 313–322, 2014b.
- 24 Alongi, D.M., Pfitzner, J., Trott, L.A., Tirendi, F., Klumpp, D.W.: Rapid sedimentation and microbial  
25 mineralization in mangrove forests of the Jiulongjiang estuary, China, *Estuar. Coast. Shelf Sci.*, 63,  
26 605–618, 2005.

- 1 Alongi, D.M.: The Energetics of Mangrove Forests, Springer Verlag Press, London, 2009.
- 2 Barr, J.G., Engel, V., Fuentes, J.D., Zieman, J.C., O'Halloran, T.L., Smith III, T.J., and Anderson, G.H.:  
3 Controls on mangrove forest-atmosphere carbon dioxide exchanges in western Everglades National  
4 Park, J. Geophys. Res., 115, G02020, 2010.
- 5 Bauza, J., Morell, J.M., Corredor, J.E: Biogeochemistry of nitrous oxide production in the red  
6 mangrove (*Rhizophora mangle*) forest soils. Estuar. Coast. Shelf Sci., 55, 697-704, 2002.
- 7 Biswas, H., Mukhopadhyay, S.K., Sen, S., and Jana, T.K.: Spatial and temporal patterns of methane  
8 dynamics in the tropical mangrove dominated estuary, NE coast of Bay of Bengal, India, J. Mar.  
9 Syst., 68, 55–64, 2007.
- 10 Bosse, U., Frenzer, P., and Conrad, R.: Inhibition of methane oxidation by ammonium in the surface  
11 layer of a littoral sediment, FEMS Microbiol. Ecol., 13, 123–34, 1993.
- 12 Bouillon, S., Borges, A.V., Castañeda-Moya, E., Diele, K., Dittmar, T., Duke, N.C., Kristensen, E., Lee,  
13 S.Y., Marchand, C., Middelburg, J.J., Rivera-Monroy, V.H., Thomas J. Smith III, T.J., and Twilley,  
14 R.R.: Mangrove production and carbon sinks: a revision of global budget estimates, Global  
15 Biogeochem. Cycles, 22, GB2013, 2008.
- 16 Bulmer, R.H., Lundquist, C.J., and Schwendenmann, L.: Sediment properties and CO<sub>2</sub> efflux from  
17 intact and cleared temperate mangrove forests. Biogeosciences, 12, 6169–6180, 2015.
- 18 Chang, T.C., and Yang, S.S. Methane emission from wetland in Taiwan, Atmos. Environ., 37, 4551–  
19 4558, 2003.
- 20 Chauhan, R., Ramanathan, A.L., and Adhya, T.K.: Assessment of methane and nitrous oxide flux from  
21 mangroves along Eastern coast of India, Geofluids, 8, 321–32, 2008.
- 22 Chen, G.C., Tam, N.F.Y., and Ye, Y.: Summer fluxes of atmospheric greenhouse gases N<sub>2</sub>O, CH<sub>4</sub> and  
23 CO<sub>2</sub> from mangrove soil in South China, Sci. Total Environ., 408, 2761-2767, 2010.
- 24 Chen, G.C., Tam, N.F.Y., Wong, Y.S., and Ye, Y.: Effect of wastewater discharge on greenhouse gas  
25 fluxes from mangrove soils, Atmos. Environ., 45, 1110-1115, 2011.
- 26 Chen, G.C., Tam, N.F.Y., and Ye, Y.: Spatial and seasonal variations of atmospheric N<sub>2</sub>O and CO<sub>2</sub>  
27 fluxes from a subtropical mangrove swamp and their relationships with soil characteristics, Soil Biol.  
28 Biochem., 48, 175-181, 2012.

1 Chen, G. C., Ulumuddin, Y. I., Pramudji, S., Chen, S. Y., Chen, B., Ye, Y., Ou, D. Y., Ma, Z. Y.,  
2 Huang, H., and Wang, J. K.: Rich soil carbon and nitrogen but low atmospheric greenhouse gas  
3 fluxes from North Sulawesi mangrove swamps in Indonesia, *Sci. Total Environ.*, 487, 91–96, 2014.

4 Chmura, G.L., Kellman, L., and Guntenspergen, G.R.: The greenhouse gas flux and potential global  
5 warming feedbacks of a northern macrotidal and microtidal salt marsh, *Environ. Res. Lett.*, 6,  
6 044016, 2011.

7 Chen, L., Yang, Z., Wang, W., Lin, P.: Critical tidal level for planting *Kandelia candel* seedlings in  
8 Xiamen, *Chin. J. Appl. Ecol*, 17, 177-181, 2006.

9 Corredor, J.E., Morell, J.M., Bauz, J.: Atmospheric nitrous oxide fluxes from mangrove soils. *Mar.*  
10 *Pollut. Bull.*, 3, 473–478, 1999.

11 Dittmar, T., Hertkorn, N., Kattner, G., and Lara, R.J.: Mangroves, a major source of dissolved organic  
12 carbon to the oceans, *Global Biogeochem. Cycles*, 20, GB1012, 2006.

13 Duarte, C.M., Middelburg, J.J., and Caraco, N.: Major role of marine vegetation on the oceanic carbon  
14 cycle, *Biogeosciences*, 2, 1–8, 2005.

15 Field, C. (Ed.): *Restoration of Mangrove Ecosystems*, International Society for Mangrove Ecosystems,  
16 Okinawa, 1996.

17 Giri, C., Ochieng, E., Tieszen, L.L., Zhu, Z., Singh, A., Loveland, T., Masek, J., and Duke, N.: Status  
18 and distribution of mangrove forests of the world using earth observation satellite data, *Global Ecol.*  
19 *Biogeogr.*, 20, 154-159, 2011.

20 Golley, F., Odum, H.T., and Wilson, R.F.: The structure and metabolism of a Puerto Rican red  
21 mangrove forest in May. *Ecology*, 43, 9-19, 1962.

22 IPCC: 2006 IPCC guideline for national greenhouse gas inventory, Prepared by the National  
23 Greenhouse Gas Inventories Programme, Eggleston HS, Buendia L, Miwa K, Ngara T and Tanabe K  
24 (eds). IGES, Japan, 2006.

25 IPCC: *Climate Change 2014: Synthesis Report. Contribution of Working Groups I, II and III to the*  
26 *Fifth Assessment Report of the Intergovernmental Panel on Climate Change [Core Writing Team,*  
27 *R.K. Pachauri and L.A. Meyer (eds.)]. IPCC, Geneva, Switzerland, 2014a.*

28 IPCC: 2013 Supplement to the 2006 IPCC guideline fir national greenhouse gas inventories: wetland,  
29 Hiraishi, T., Krug, T., Tanabe, K., Srivastava, N., Baasansuren, J., Fukuda, M., and Troxler, T.G.  
30 (eds). IPCC, Switzerland, 2014b.

1 Kreuzwieser, J., Buchholz, J., and Rennenberg, H.: Emission of methane and nitrous oxide by  
2 Australian mangrove ecosystems, *Plant Biol.*, 5, 423-431, 2003.

3 Komiyama, A., Ong, J.E., and Pongpan, S.: Allometry, biomass, and productivity of mangrove  
4 forests: a review, *Aquat. Bot.*, 89, 128-137, 2008.

5 Lee, S.Y.: Litter production and turnover of the mangrove *Kandelia candel* (L.) druce in a Hong Kong  
6 tidal shrimp pond, *Estuar. Coast. Shelf Sci.*, 29, 75-87, 1989.

7 Lee, S.Y.: Primary productivity and particulate organic matter flow in an estuarine mangrove-wetland  
8 in Hong Kong, *Mar. Biol.*, 106, 453-463, 1990.

9 Lin, P., Lu, C.Y., Lin, G.H., Chen, R.H., and Su, L.: Studies on mangrove ecosystem of Jiulongjiang  
10 River Estuary in China I. The biomass and productivity of *Kandelia candel* community, *J. Xiamen  
11 Univ. Nat. Sci.* 24, 508-514, 1985. (In Chinese)

12 Liu, L. and Greaver, T.L.: A review of nitrogen enrichment effects on three biogenic GHGs: the CO<sub>2</sub>  
13 sink may be largely offset by stimulated N<sub>2</sub>O and CH<sub>4</sub> emission, *Ecol. Lett.*, 12, 1103-1117, 2009.

14 Lovelock, C.E.: Soil respiration and belowground carbon allocation in mangrove forests, *Ecosystems*,  
15 11, 342-354, 2008.

16 Lewis, D.B., Brown, J.A., Jimenez, K.L.: Effects of flooding and warming on soil organic matter  
17 mineralization in *Avicennia germinans* mangrove forests and *Juncus roemerianus* salt marshes,  
18 *Estuar. Coast. Shelf Sci.*, 139, 11-19, 2014.

19 Leopold, A., Marchand, C., Deborde, J., Allenbach, M.: Temporal variability of CO<sub>2</sub> fluxes at the  
20 sediment-air interface in mangroves (New Caledonia), *Sci. Total Environ.*, 502, 617-626, 2015.

21 Lu, C., Zheng, F.Z., Lin, P.: Study on litter fall production of *Kandelia candel* mangrove community in  
22 estuary, *J. Xiamen Univ. Nat. Sci.*, 27, 459-463, 1988.

23 Lu, C., Wong, Y., Tam, N.F.Y., Ye, Y., Cui, S., Lin, P.: Preliminary studies on methane fluxes in  
24 Hainan mangrove communities, *Chin. J. Oceanol. Limnol.*, 16, 64-71, 1998.

25 Maher, D. T., Santos, I. R., Golsby-Smith, L., Gleeson, J., and Eyre, B. D.: Groundwater-derived  
26 dissolved inorganic and organic carbon exports from a mangrove tidal creek: The missing mangrove  
27 carbon sink? *Limnol. Oceanogr.* 58, 475-488, 2013.

28 Mcleod, E., Chmura, G.L., Bouillon, S., Salm, R., Björk, M., Duarte, C.M., Lovelock, C.E.,  
29 Schlesinger, W.H., and Silliman, B.R.: A blueprint for blue carbon: toward an improved

1 understanding of the role of vegetated coastal habitats in sequestering CO<sub>2</sub>, *Front. Ecol. Environ.*, 9,  
2 552–560, 2011

3 Moore, T.R., and Roulet, N.T.: A comparison of dynamic and static chambers for methane emission  
4 measurements from subarctic fens. *Atmosphere-Ocean*, 29:1, 102-109, 1991.

5 Mosier, A.R., Halvorson, A.D., Peterson, G.A., Robertson, G.P., and Sherrod, L.: Measurement of net  
6 global warming potential in three agroecosystems, *Nutr. Cycl. Agroecosys.*, 72, 67–76, 2005.

7 Muñoz-Hincapié, M., Morell, J.M., and Corredor, J.E.: Increase of nitrous oxide flux to the atmosphere  
8 upon nitrogen addition to red mangroves sediments, *Mar. Pollut. Bull.*, 44, 992-996, 2002.

9 Myhre, G., Shindell, D., Bréon, F.-M., Collins, W., Fuglestedt, J., Huang, J., Koch, D., Lamarque, J.-  
10 F., Lee, D., Mendoza, B., Nakajima, T., Robock, A., Stephens, G., Takemura T., and Zhang, H.:  
11 Anthropogenic and natural radiative forcing, in: *Climate Change 2013: the Physical Science Basis*  
12 *Contribution of Working Group I to the Fifth Assessment Report of the Intergovernmental Panel on*  
13 *Climate Change* (eds. Stocker, T.F., Qin, D., Plattner, G.K., Tignor, M., Allen, S.K., Boschung, J.,  
14 Nauels, A., Xia, Y., Bex V., and Midgley P.M.), Cambridge University Press, Cambridge, 2013.

15 Nóbrega, G.N., Ferreira, T.O., Siqueira Neto, M., Queiroz, H.M., Artur, A.G., De S. Mendonça, E., De  
16 O. Silva, E., Otero., X.L.: Edaphic factors controlling summer (rainy season) greenhouse gas  
17 emissions (CO<sub>2</sub> and CH<sub>4</sub>) from semiarid mangrove soils (NE-Brazil), *Sci. Total Environ.*, 542, 685–  
18 693, 2016.

19 Odum, W.E., McInvor, C.C., and Smith III, T.J.: *The Ecology of the Mangroves of South Florida: a*  
20 *Community Profile*, United States Fish and Wildlife Service, Office of Biological Services,  
21 Washington D.C., 1982.

22 Page, A.L., Miller, R.H., and Keeney, D.R. (Eds.): *Methods of Soil Analysis Part 2 Chemical and*  
23 *Microbiological Properties*, Wisconsin, USA: American Society of Agronomy, 1982.

24 Pitty, A.F. (Ed.): *Geography and Soil Properties*, Methuen, London, pp. 188, 1979.

25 Poffenbarger, H.J., Needelman, B.A., and Megonigal, P.J.: Salinity influence on methane emissions  
26 from tidal marshes, *Wetlands*, 31, 831–842, 2011.

27 Pongparn, S., Komiyama, A., Tanaka, A., Sangtiewan, T., Maknual, C., Kato, S., Tanapermpool, P.,  
28 and Patanaponpaiboon, P., Carbon dioxide emission through soil respiration in a secondary  
29 mangrove forest of eastern Thailand, *J. Tropic. Ecol.*, 25, 393-400, 2009.

- 1 Purvaja, R. and Ramesh, R.: Natural and anthropogenic methane emission from coastal wetlands of  
2 South India. *Environ. Manage.*, 27, 547–57, 2011.
- 3 Teas, H.J.: Silviculture with saline water, in: *The Biosaline Concept* (eds. Hollaender, A., Aller, J.C.,  
4 Epstein, E., Pietro, A.S. and Zaborsky, O.R.), Springer, New York, 1979.
- 5 Tomlinson, P.B.: *The Botany of Mangrove*. Cambridge University Press, Cambridge, 1986.
- 6 Tong, C., Huang, J.F., Hu, Z.Q., Jin, Y.F.: Diurnal variations of carbon dioxide, methane, and nitrous  
7 oxide vertical fluxes in a subtropical estuarine marsh on neap and spring tide days. *Estuar. Coast.*, 36,  
8 633–642, 2013.
- 9 Twilley, R.R., Chen, R.H., Hargis, T.: Carbon sinks in mangroves and their implications to carbon  
10 budget of tropical coastal ecosystems. *Water Air Soil Pollut.*, 64, 265-288, 1992.
- 11 Wang, W., Wang, M.: *The mangrove of China*. Science Press: Beijing, 2007.
- 12 Ye, Y., Chen, Y.P., Chen, G.C.: Litter production and litter elemental composition in two rehabilitated  
13 *Kandelia obovata* mangrove forests in Jiulongjiang Estuary, China. *Mar. Environ. Res.*, 83, 63-72,  
14 2013.
- 15 Ye, Y., Pang B., Chen, G., Chen, Y.: Processes of organic carbon in mangrove ecosystems, *Acta Ecol.*  
16 *Sin.*, 31, 169-173, 2011.
- 17 Yuan, J., Ding, W., Liu, D., Kang, H., Freeman, C., Xiang, J., and Lin, Y.: Exotic *Spartina alterniflora*  
18 invasion alters ecosystem–atmosphere exchange of CH<sub>4</sub> and N<sub>2</sub>O and carbon sequestration in a  
19 coastal salt marsh in China, *Global Change Biol.*, doi: 10.1111/gcb.12797, 2014.
- 20 Zheng, W.J., Xue, X., and Lin, P.: Studies on dynamics of carbon, hydrogen and nitrogen elements for  
21 *Kandelia candel* mangrove community in Fujian, China, *Acta Ecol. Sin.*, 15, 229-234, 1995.
- 22

1 Table 1. Litter fall production and net primary production (gDW m<sup>-2</sup> yr<sup>-1</sup>) in the three mangrove sites in  
 2 the Jiulong River Estuary.

| Mangrove | Leaf      | Twig      | Reproduction | Total      | NPP        |
|----------|-----------|-----------|--------------|------------|------------|
| CPT      | 683±101 a | 241±105 a | 641±234 a    | 1565±246 a | 4306±676 a |
| XG       | 692±86 a  | 267±164 a | 458±177 a    | 1417±189 a | 3899±519 a |
| HMI      | 275±121b  | 52±72 b   | 444±160 a    | 771±143 b  | 2119±393 b |
| JRE      | 550±222   | 187±151   | 514±207      | 1251±355   | 3441±1098  |

3 CPT: Caoptou; XG: Xiaguo; HMI: Haimen Island; JRE: Jiulong River Estuary; NPP: Net primary  
 4 production. Different letters in one column indicate a significant difference among the three mangrove  
 5 sites. Data are mean ± SE of each site or the three sites (n =9 for each site and n=36 for JRE, the same  
 6 as for Table 3)

1 Table 2. Pearson correlation coefficient values (r) between soil properties and summer fluxes of  
 2 greenhouse gases in Jiulong River Estuary.

| Soil parameter                  | Fluxes of gases  |                 |                 | Total CO <sub>2</sub> -<br>equivalent flux |
|---------------------------------|------------------|-----------------|-----------------|--------------------------------------------|
|                                 | N <sub>2</sub> O | CH <sub>4</sub> | CO <sub>2</sub> |                                            |
| Redox potential                 | -0.323           | -0.126          | -0.130          | -0.157                                     |
| Bulk density                    | 0.406            | 0.311           | 0.152           | 0.160                                      |
| Water content                   | 0.424            | 0.329           | 0.175           | 0.359                                      |
| NH <sub>4</sub> <sup>+</sup> -N | 0.575*           | 0.730**         | 0.618*          | 0.720**                                    |
| NO <sub>3</sub> <sup>-</sup> -N | -0.199           | 0.008           | -0.205          | -0.175                                     |
| OC                              | 0.756***         | 0.838***        | 0.713**         | 0.831***                                   |
| TKN                             | 0.812***         | 0.541*          | 0.724**         | 0.789***                                   |

3 OC: organic carbon, TKN: total Kjeldahl nitrogen. \*, \*\* and \*\*\* indicate significant r value at p<0.05,  
 4 0.01 and 0.001, respectively (n=18). No correlation was done between porewater salinity and gas flux  
 5 as the porewater samples were collected out of the sampling areas.



Table 3. Net ecosystem production and the mitigating effects of wetlands on global warming in the Jiulong River Estuary

| Study site | Soil C-gas flux<br>(g C m <sup>-2</sup> yr <sup>-1</sup> ) | Net primary production<br>(g C m <sup>-2</sup> yr <sup>-1</sup> ) | Net ecosystem production<br>(g C m <sup>-2</sup> yr <sup>-1</sup> ) | Plant CO <sub>2</sub> sequestration rate<br>(g CO <sub>2</sub> m <sup>-2</sup> yr <sup>-1</sup> ) | CO <sub>2</sub> equivalent flux <sup>A</sup><br>(g CO <sub>2</sub> m <sup>-2</sup> yr <sup>-1</sup> ) | Ecosystem mitigation effect <sup>B</sup><br>(g CO <sub>2</sub> m <sup>-2</sup> yr <sup>-1</sup> ) |
|------------|------------------------------------------------------------|-------------------------------------------------------------------|---------------------------------------------------------------------|---------------------------------------------------------------------------------------------------|-------------------------------------------------------------------------------------------------------|---------------------------------------------------------------------------------------------------|
| CPT        | 278±515                                                    | 2024±317                                                          | 1746                                                                | 7420±1165                                                                                         | 1125±2050 (9.8 %)                                                                                     | 6295 (15.2%)                                                                                      |
| XG         | 415±572                                                    | 1832±244                                                          | 1417                                                                | 6719±894                                                                                          | 2200± 3032 (33.2 %)                                                                                   | 4519 (32.7%)                                                                                      |
| HMI        | 84±133                                                     | 996±185                                                           | 912                                                                 | 3652±677                                                                                          | 340± 513(9.7 %)                                                                                       | 3312 (9.3%)                                                                                       |
| JRE        | 259±468                                                    | 1617±516                                                          | 1358                                                                | 5930±1893                                                                                         | 1222± 2249(23.8 %)                                                                                    | 4708 (20.6%)                                                                                      |

CPT: Caoputou; XG: Xiaguo; HMI: Haimen Island; JRE: Jiulong River Estuary. Data are means ±SD for each site or for the JRE (for gas flux, n=36 for each site and n=108 for JRE).

5 Net primary production was derived from litter fall production (Table 2) and the carbon content in plants (47 %). Net ecosystem production was estimated through NPP minus soil respiration rate, i.e. soil C-gas flux (the sum of CO<sub>2</sub>-C and CH<sub>4</sub>-C fluxes). The ecosystem mitigation effect was estimated by comparing the annualized warming effect of gas emissions against the CO<sub>2</sub> sequestration rate of plants.

A: Value in the bracket represents the proportion of N<sub>2</sub>O and CH<sub>4</sub> gases to the total CO<sub>2</sub>-equivalent flux.

B: Value in the bracket represents the proportion of warming effect of gas emissions to the plant CO<sub>2</sub> sequestration rate.

## Figure captions

Fig. 1 Map of the Jiulong River Estuary, China and the typical scene of the mangrove forest (A and B). Numbers 1-3 indicate the positions of the three sampling sites in this study, 1: Caoputou; 2: Xiaguo; 3: Haimen Island;

5 Fig. 2 Soil to atmosphere greenhouse gas flux (mean $\pm$ SE, n=9 for the seasonal fluxes and 36 for the annual mean fluxes) at the mangrove sites in Jiulong River Estuary. Same abbreviation as Fig. 1. In each season, different letters (in lower case) indicated significant difference among the three mangrove sites according to ANOVA test. For each mangrove site, different letters (in capital) indicated significant difference among the four seasons.

Fig. 3 Soil characteristics (mean $\pm$ SE, n=6) at the mangrove sites in Jiulong River Estuary. Same abbreviation as Fig. 1. Different letters indicated significant difference among the three mangrove sites according to ANOVA test.

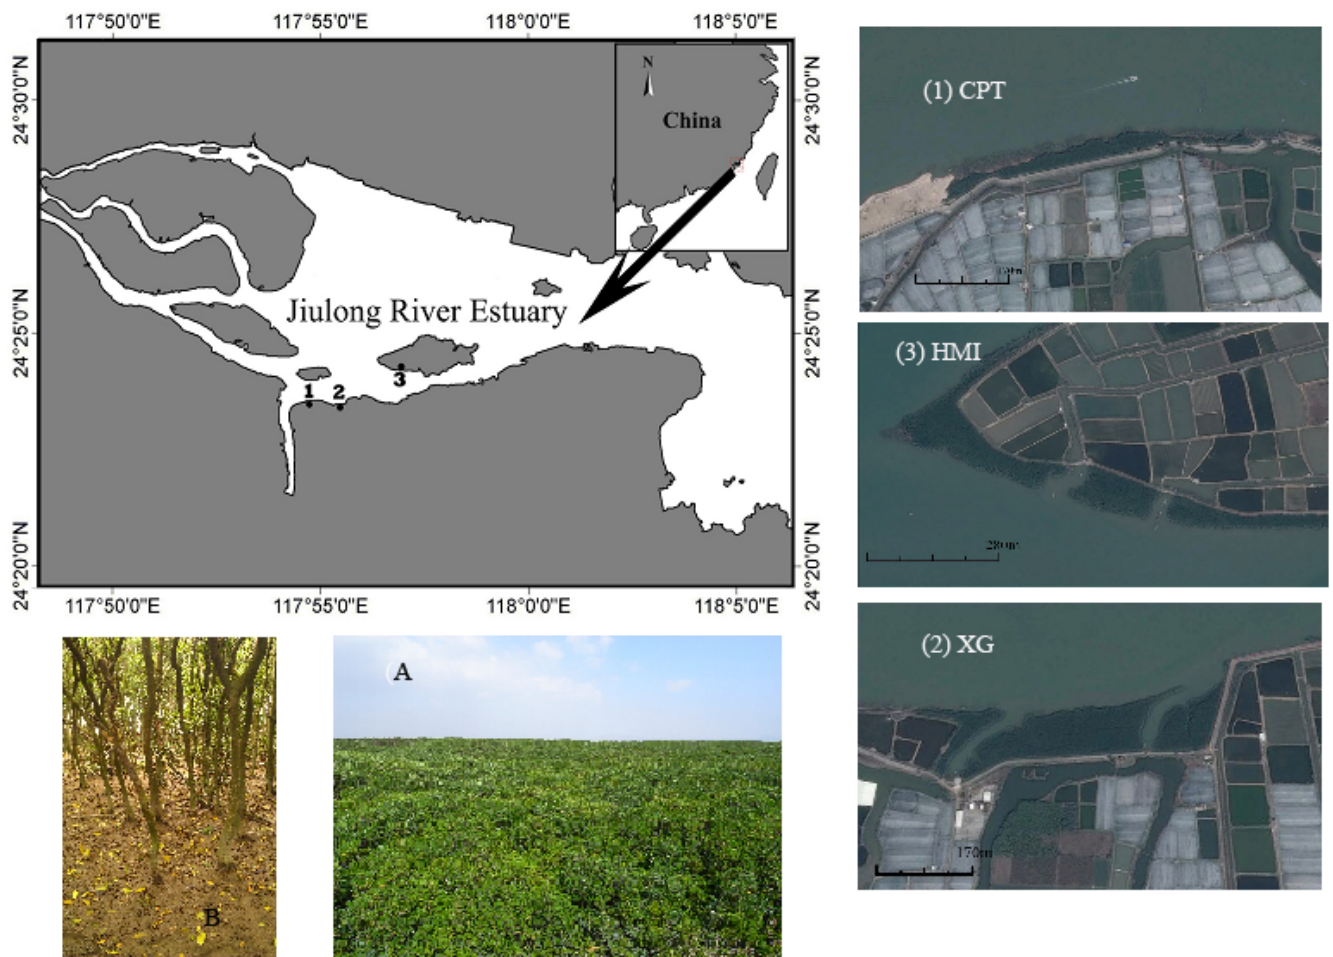

Fig. 1

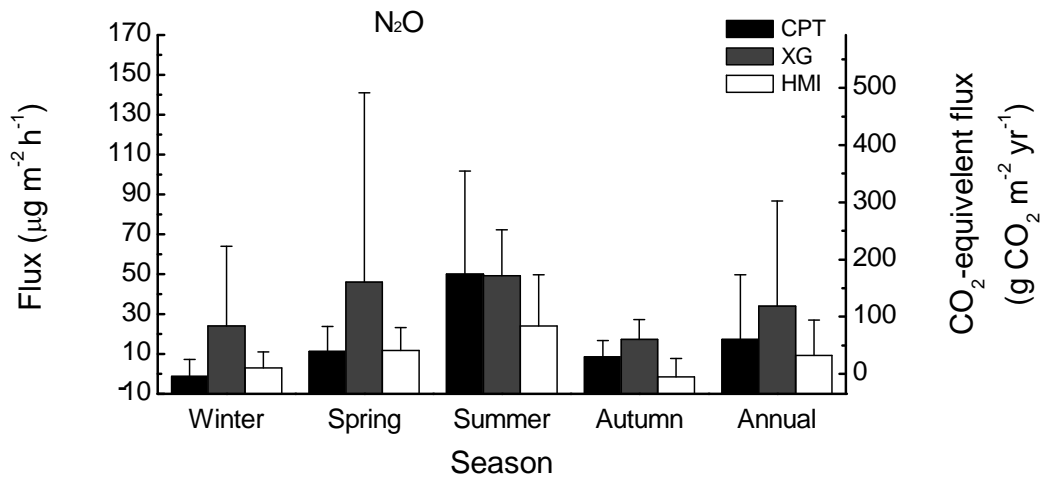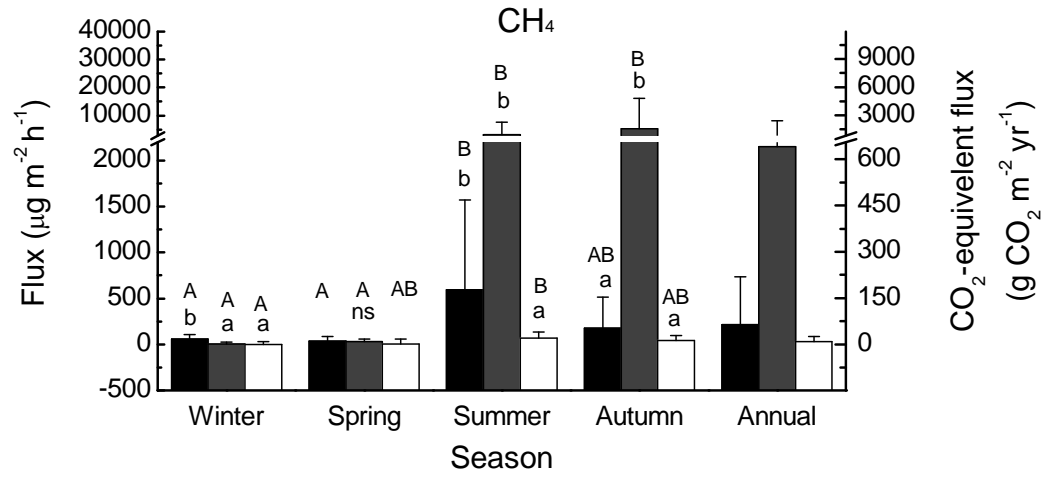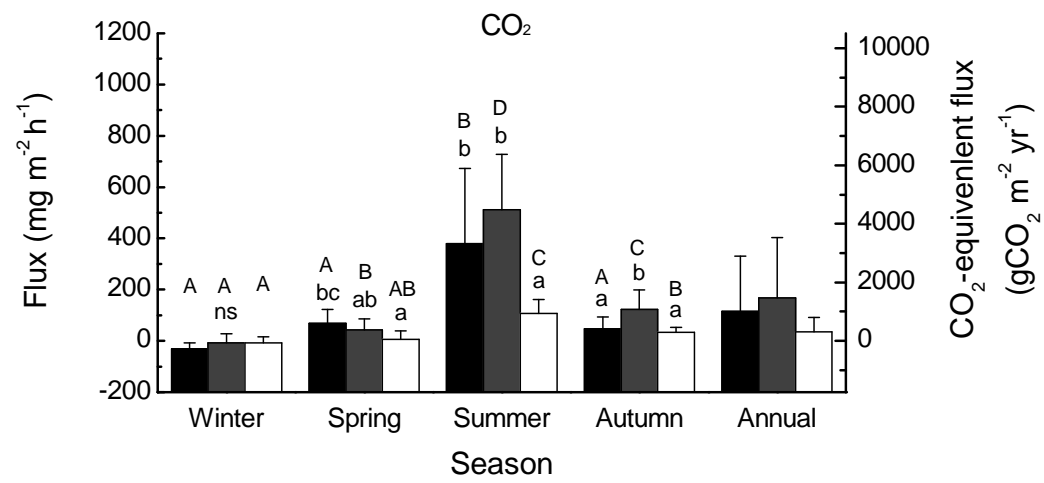

Fig. 2

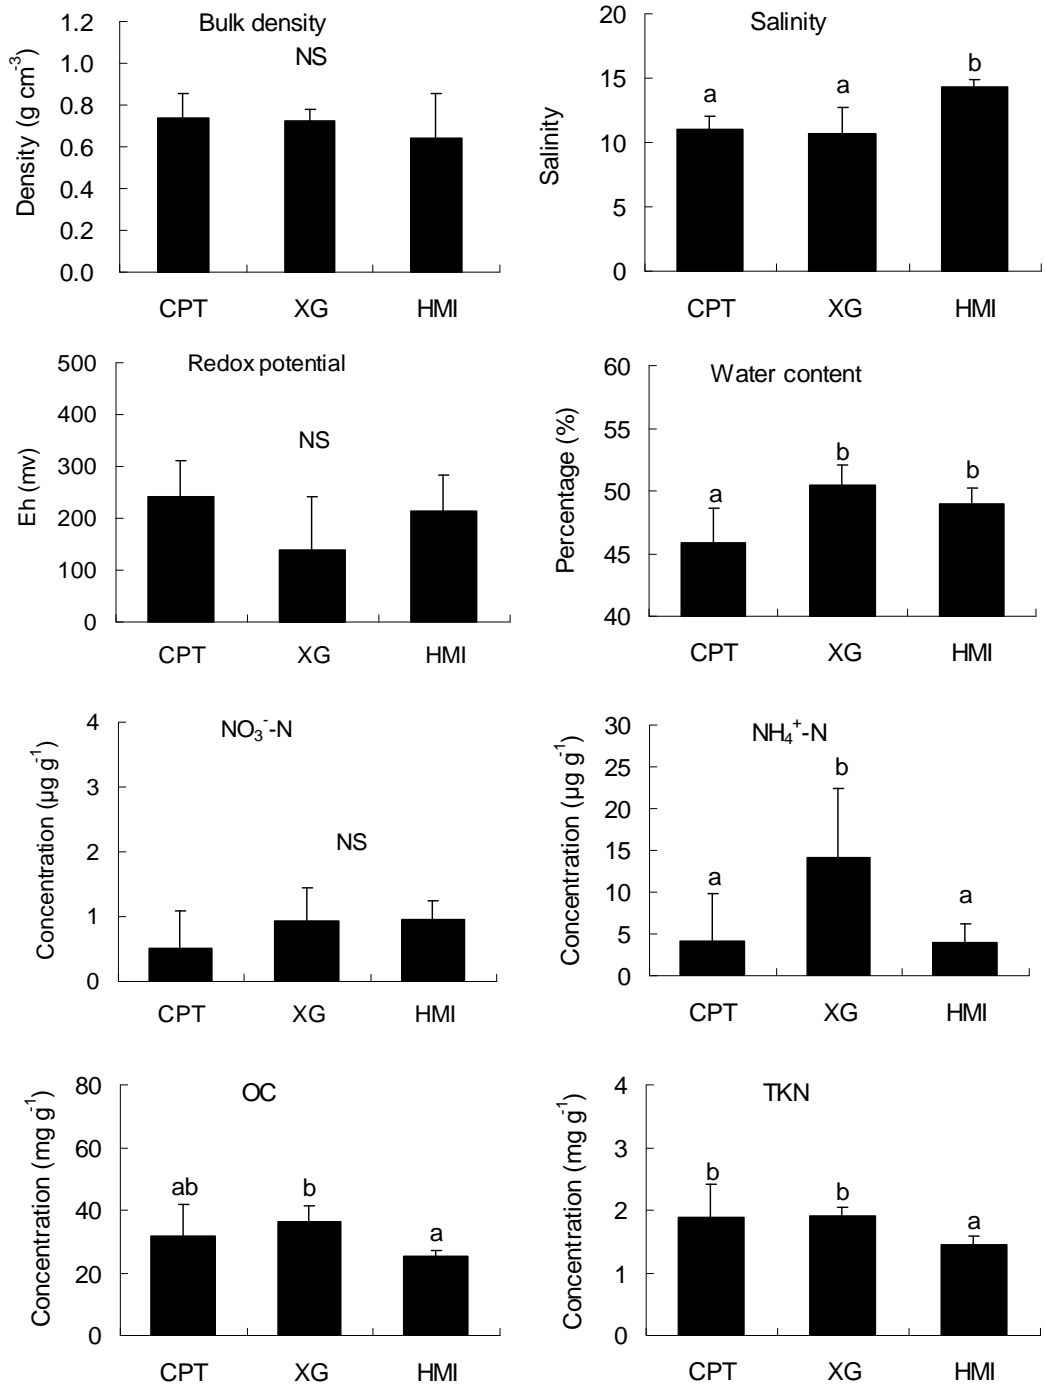

Fig. 3
