# Supplementary material for: Soil greenhouse gases emissions reduce the benefit of mangrove plant to mitigating atmospheric warming effect
Source: Copernicus journal article supplement (doi:10.5194/bg-2015-662), 2016-02-10
Supplement: Supplementary file [file Supplementray Figs. 1-4.pdf › Supplementray Figs. 1-4.pdf]

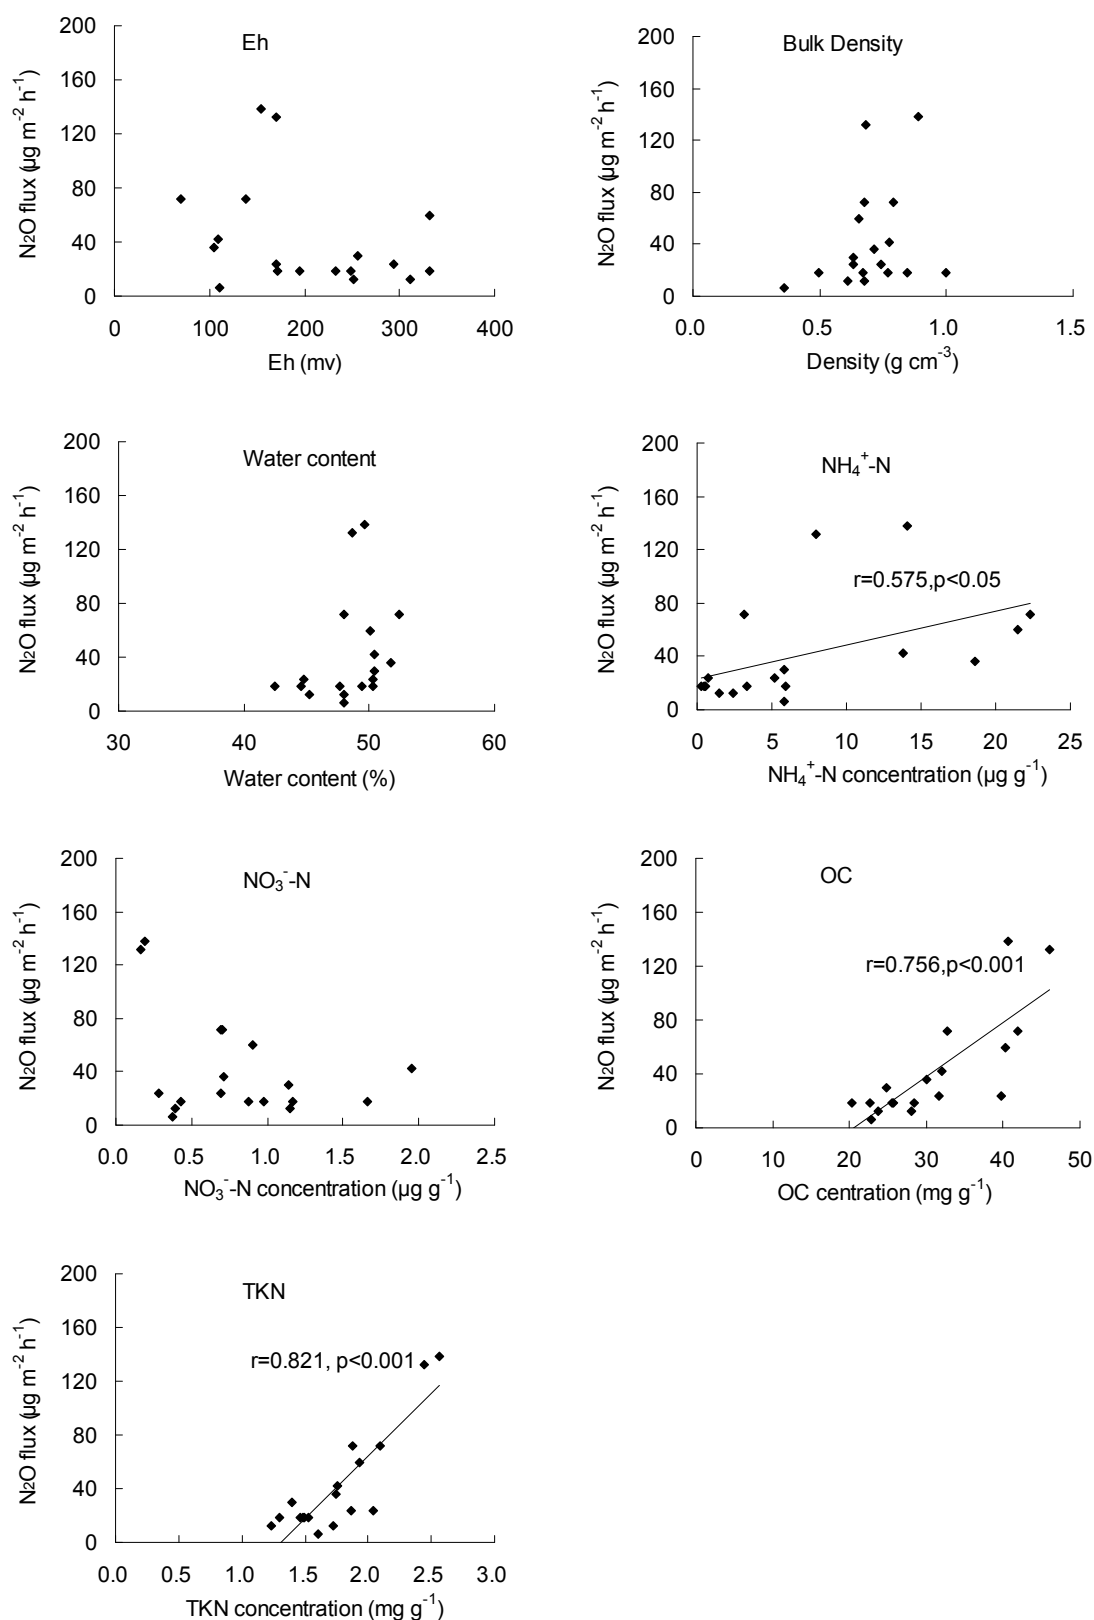

Supplementary Fig. 1 Relationship between the soil parameters and the  $\text{N}_2\text{O}$  flux. Solid lines represent the fitted regression equations, and  $r$  is the corresponding linear correlation coefficient between the soil parameter and normalized flux.

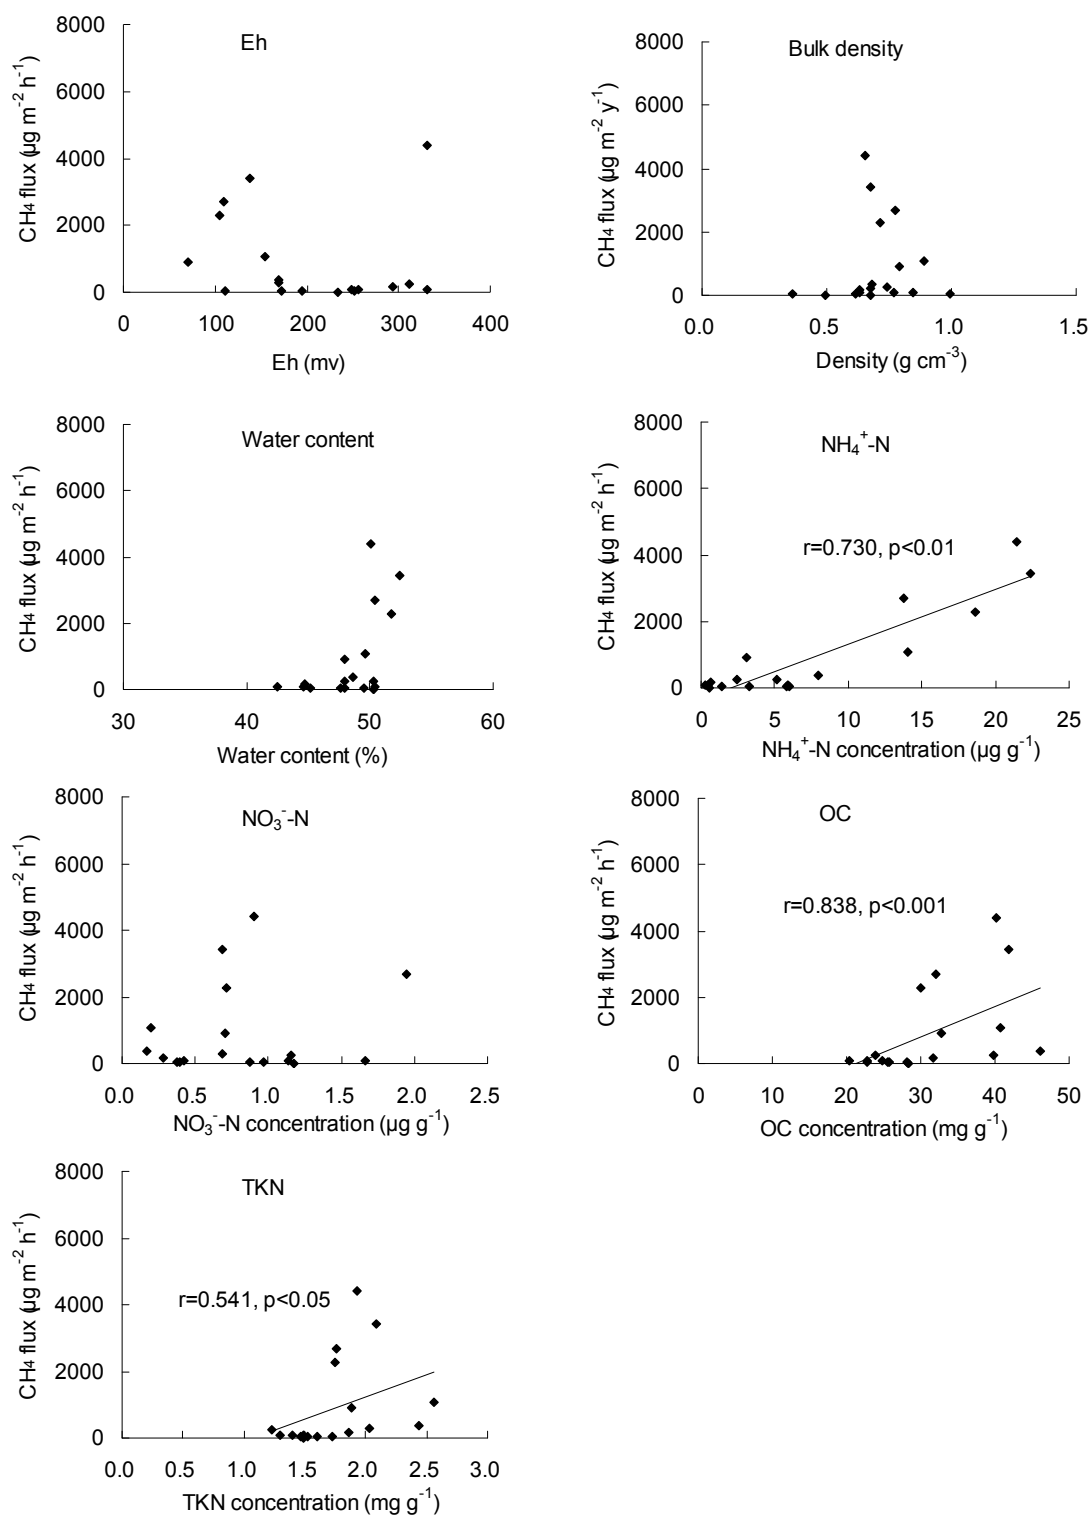

Supplementary Fig. 2 Relationship between the soil parameters and the  $\text{CH}_4$  flux. Solid lines represent the fitted regression equations, and  $r$  is the corresponding linear correlation coefficient between the soil parameter and normalized flux.

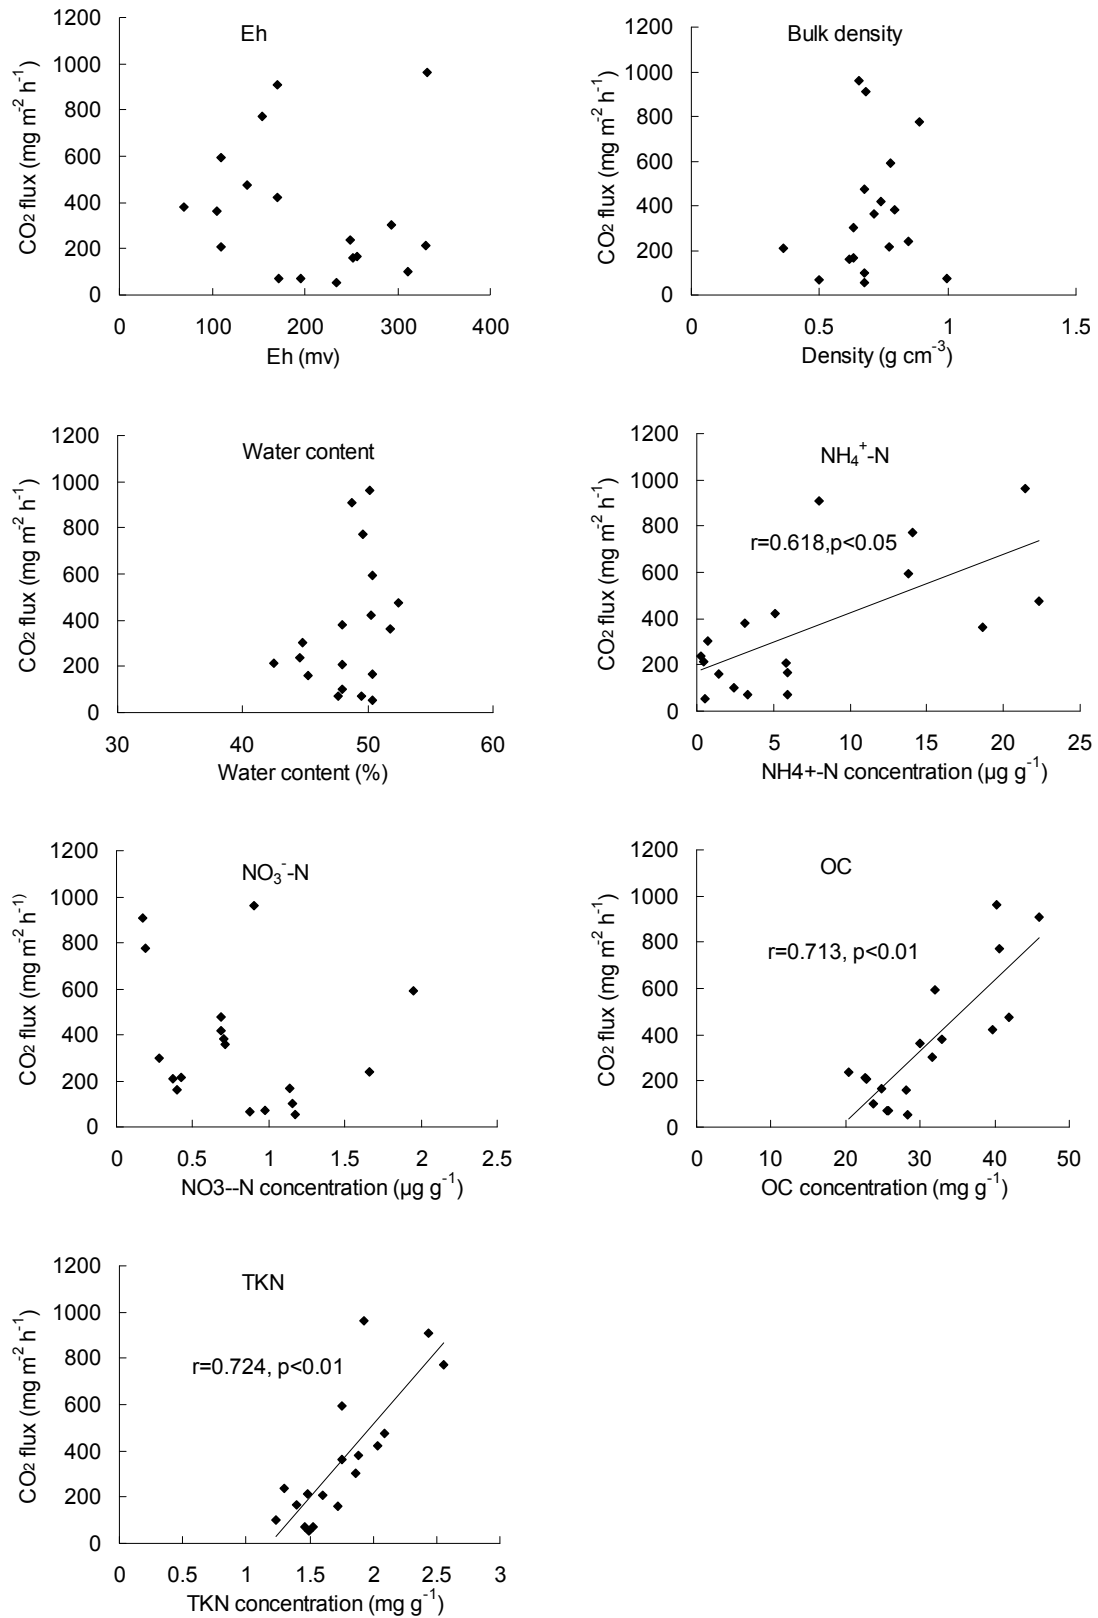

Supplementary Fig. 3 Relationship between the soil parameters and the CO<sub>2</sub> flux. Solid lines represent the fitted regression equations, and  $r$  is the corresponding linear correlation coefficient between the soil parameter and normalized flux.

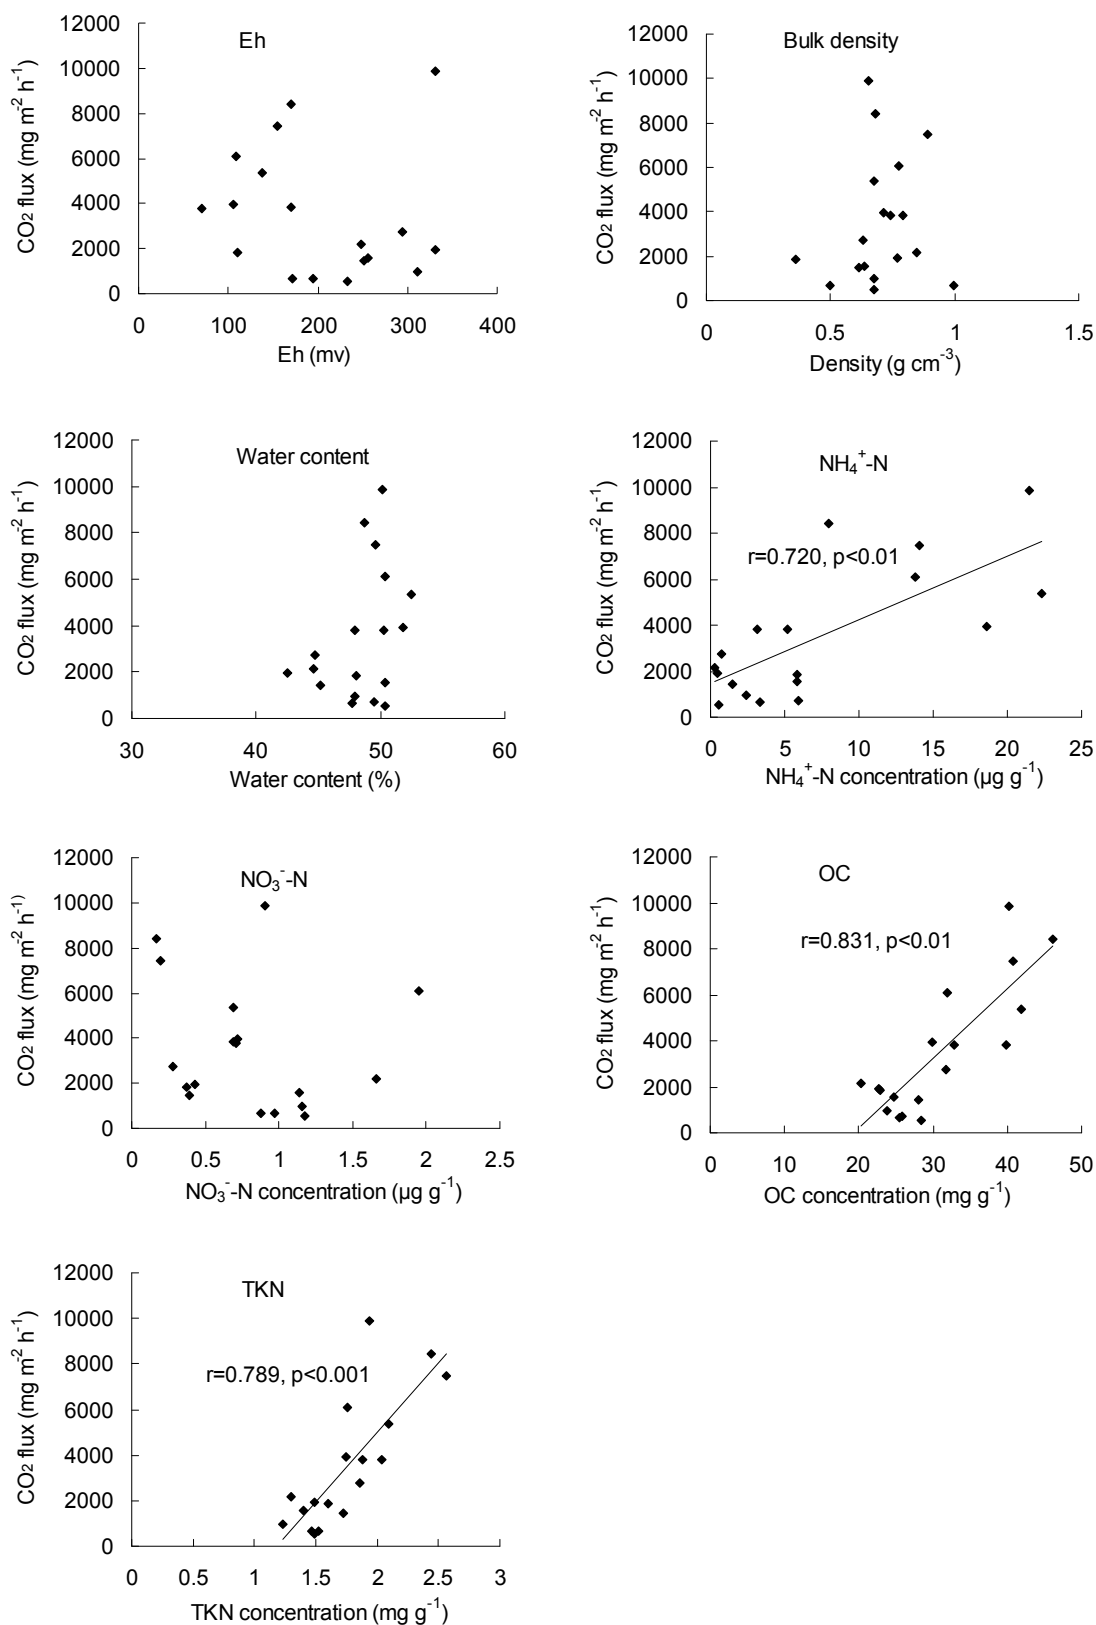

Supplementary Fig. 4 Relationship between the soil parameters and the total CO<sub>2</sub>-equivalent flux of the three gases. Solid lines represent the fitted regression equations, and  $r$  is the corresponding linear correlation coefficient between the soil parameter and normalized flux.
